# Supplementary material for: Incidence and mortality of kidney cancer: temporal patterns and global trends in 39 countries
Source: PubMed Central journal article supplement (PMC5691143; doi:10.1038/s41598-017-15922-4), 2017-11-16

# Incidence and mortality of kidney cancer: temporal patterns and global trends in 38 countries

Martin CS Wong MD, MPH, Bill W Goggins DSc (Harvard), Benjamin HK Yip PhD, Franklin DH Fung BSc, Colette Leung BSc, Yuan Fang PhD, Samuel YS Wong MD, MPH (Johns Hopkins), CF Ng MD

**Supplementary Figure 1 Temporal trends in the age-standardized incidence and mortality of kidney cancer according to country and gender**

## 1). Latin America and the Caribbean

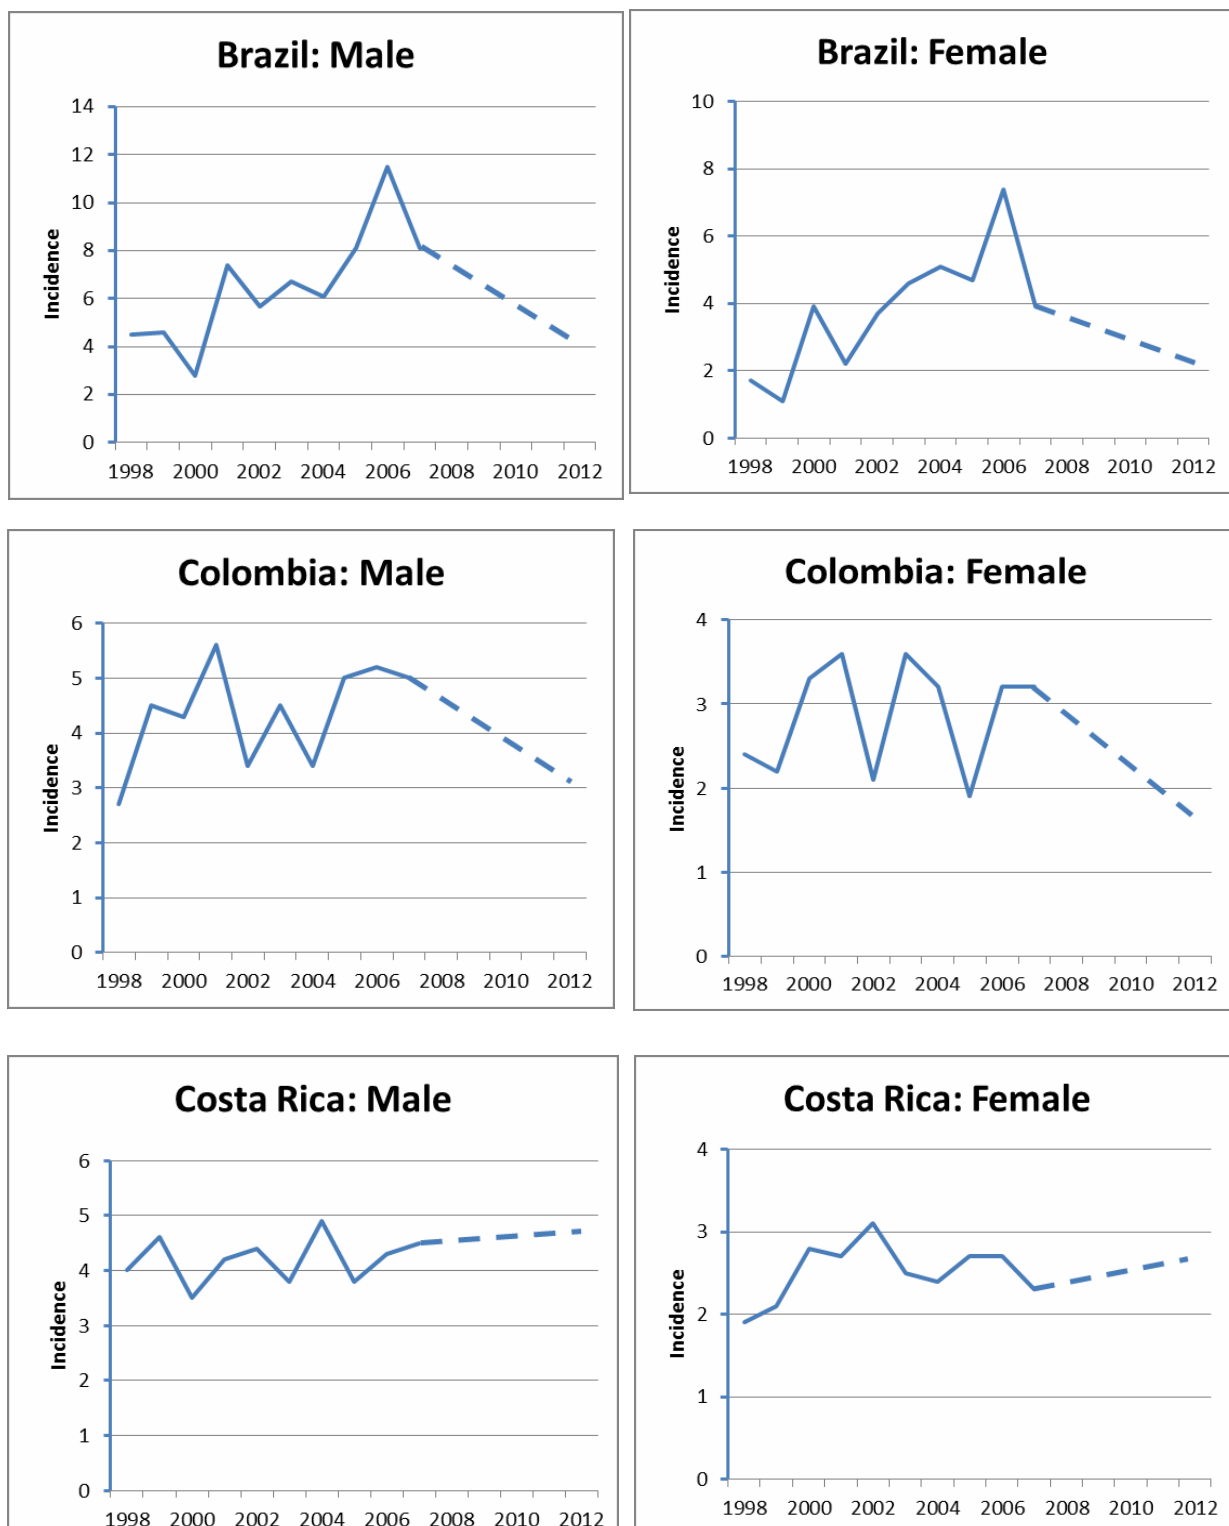

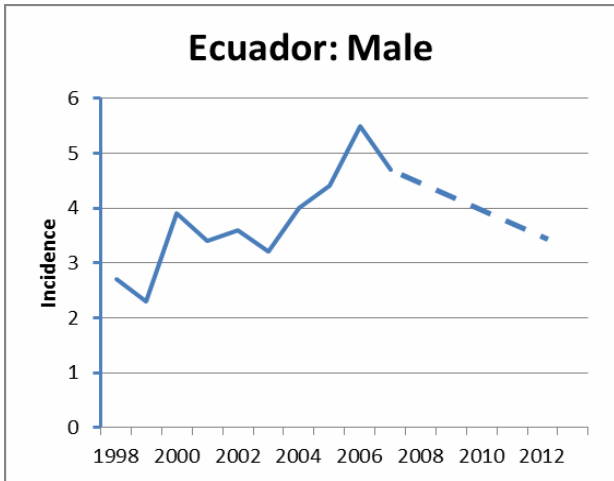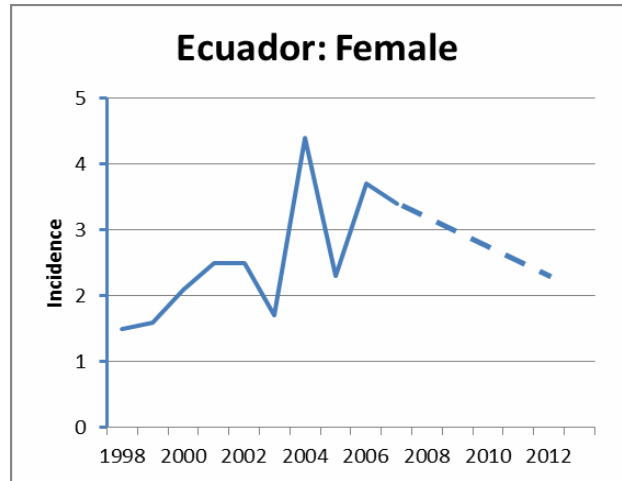

## 2). Northern America

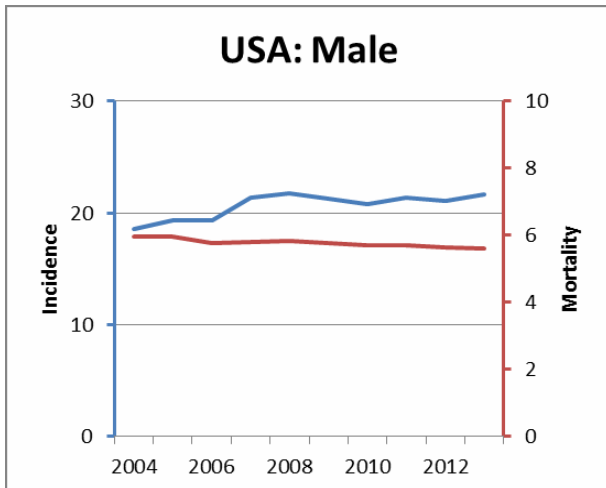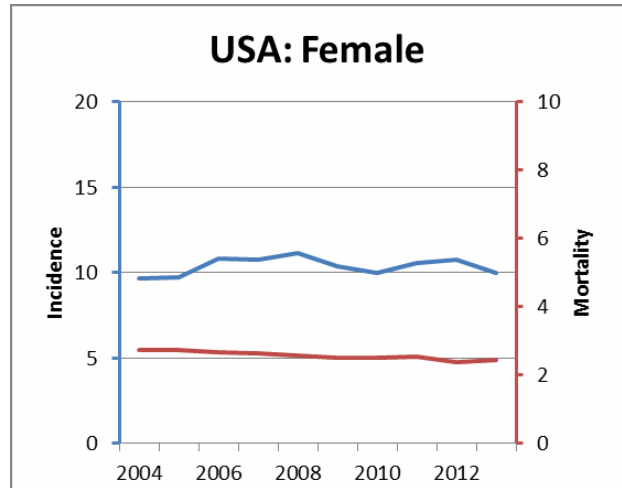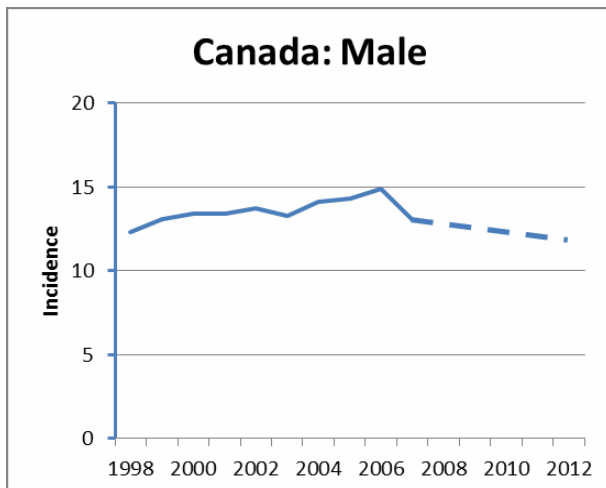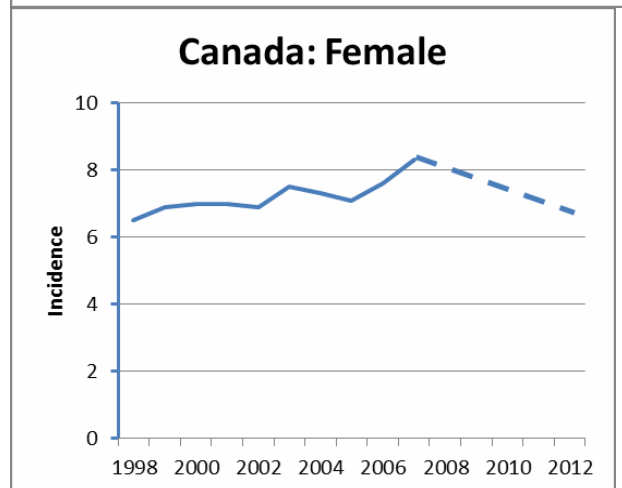

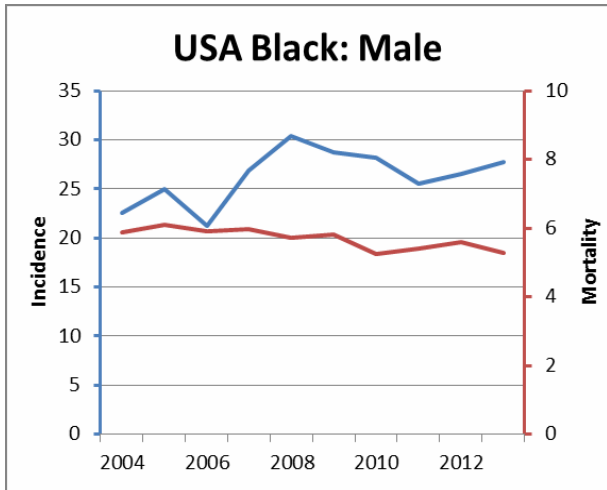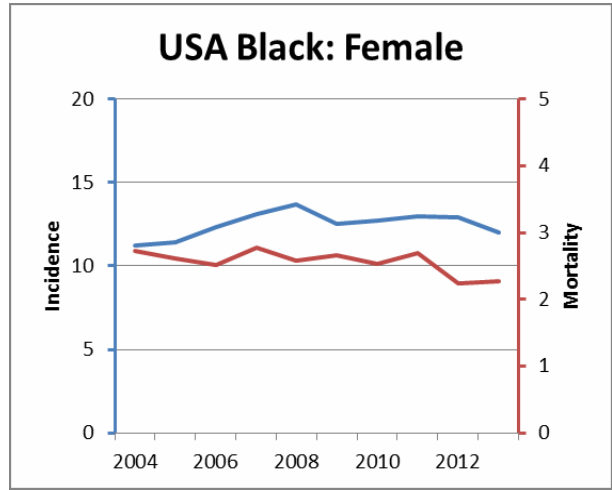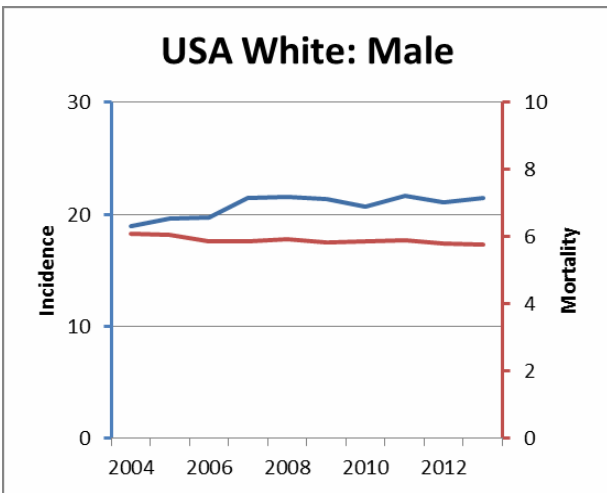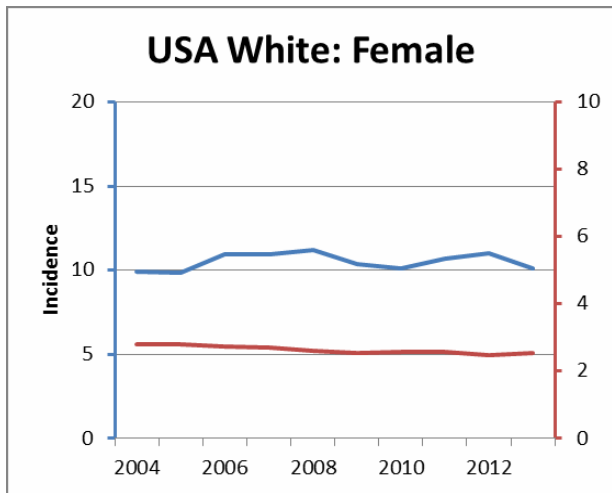

### 3). Asia

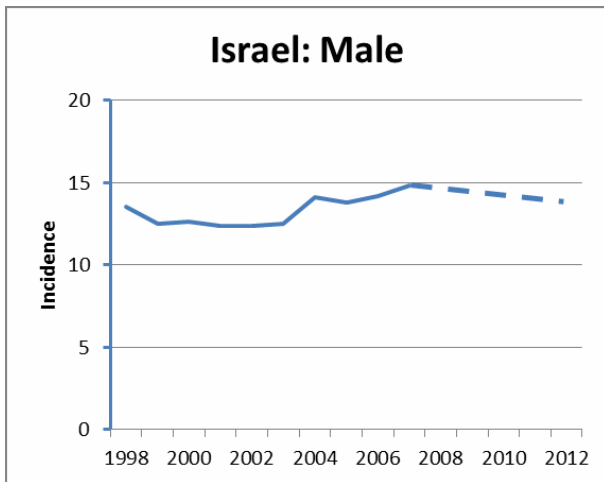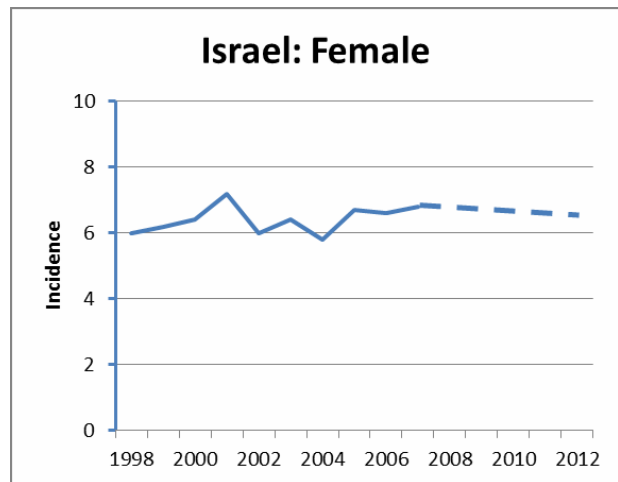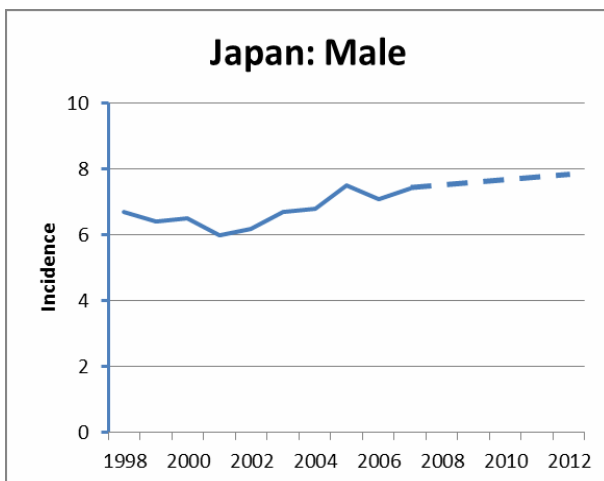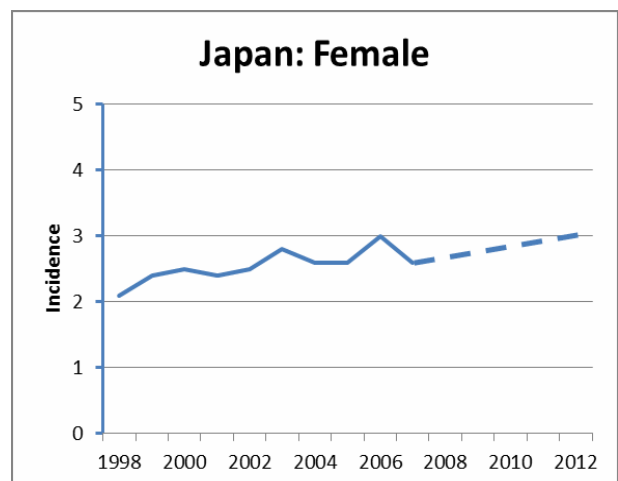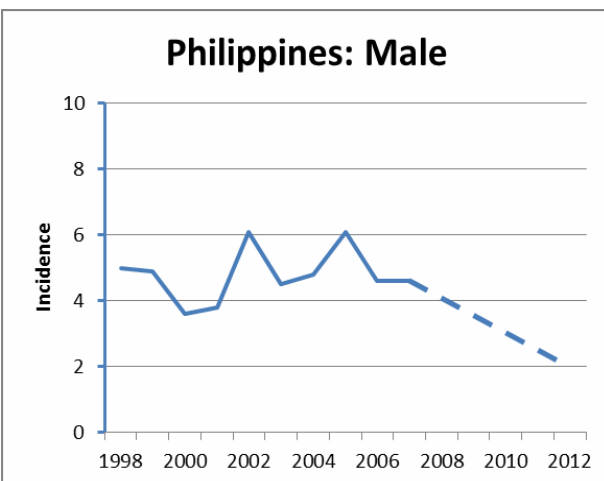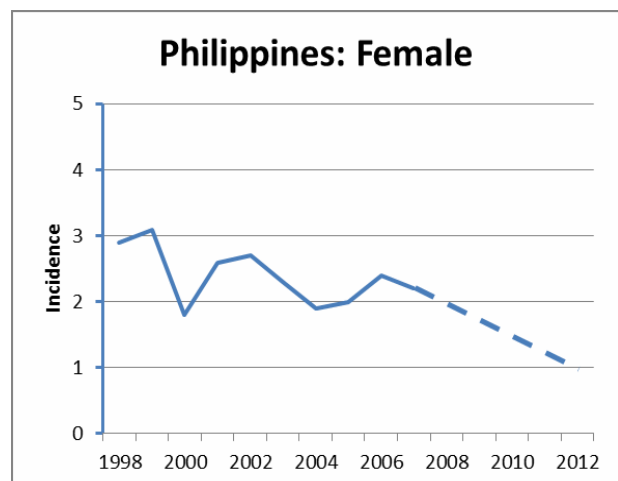

### Singapore: Male

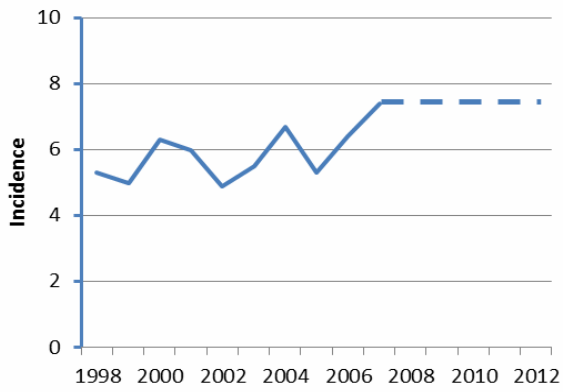

### Singapore: Female

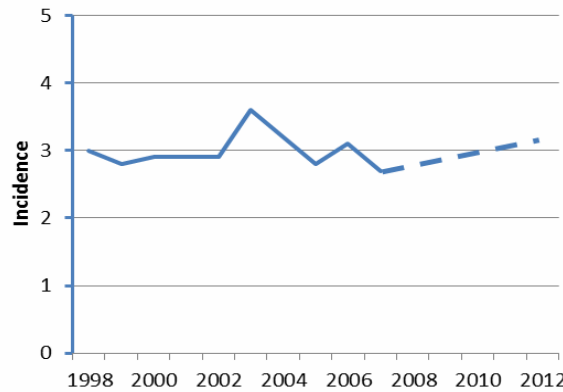

### Thailand: Male

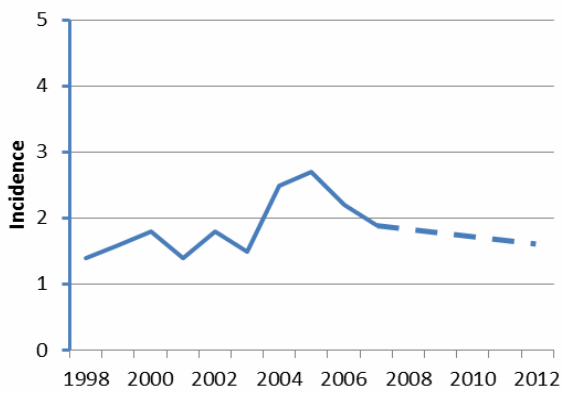

### Thailand: Female

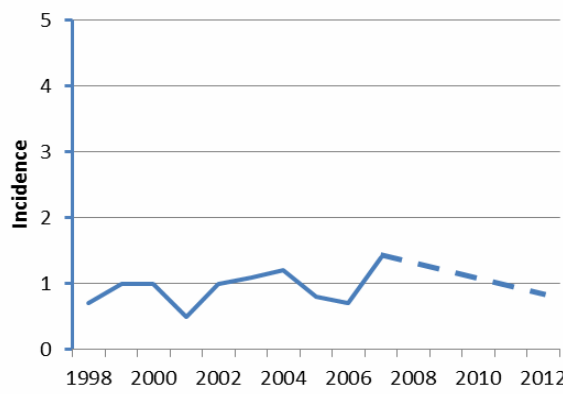

### India: Male

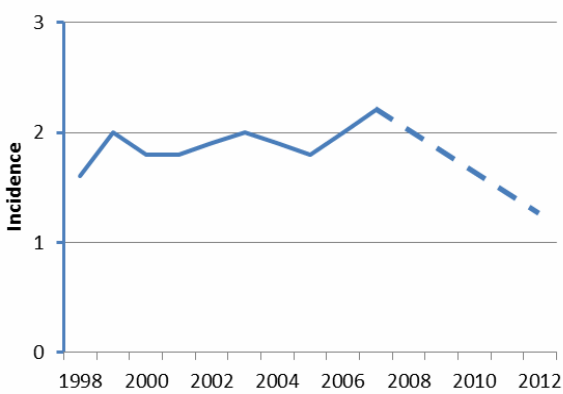

### India: Female

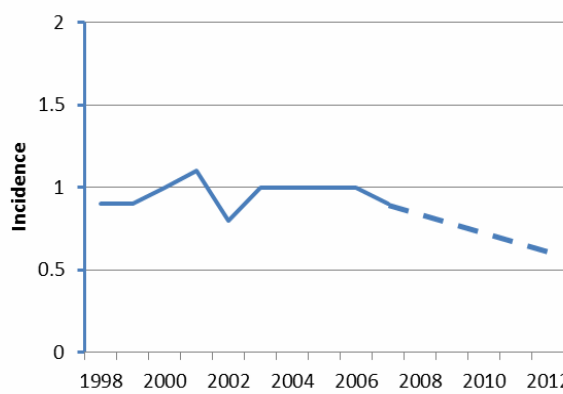

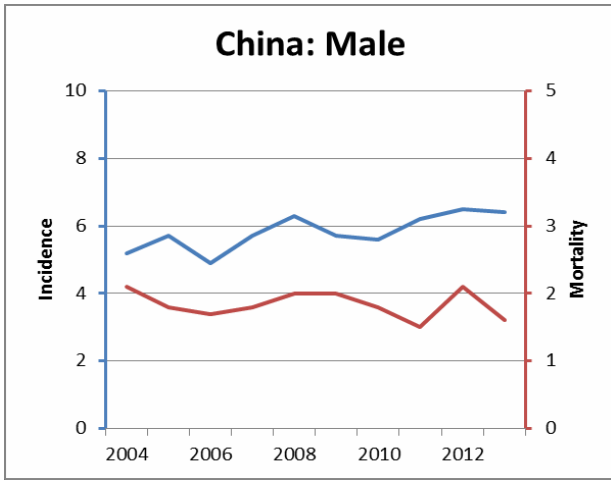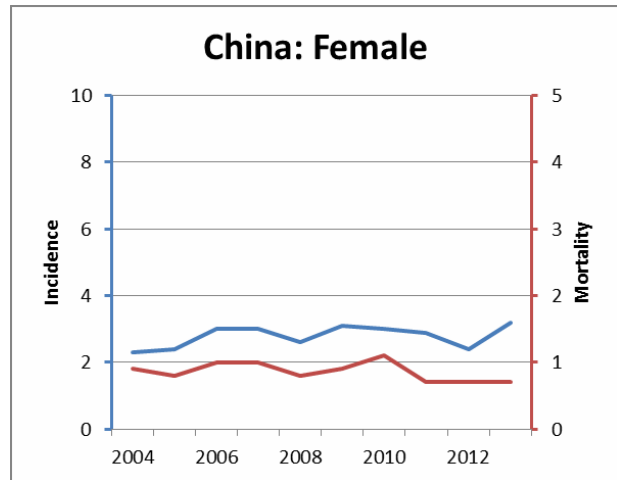

#### 4). Oceania

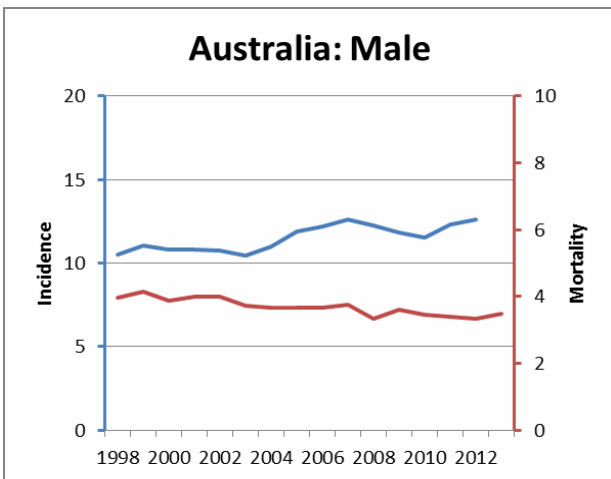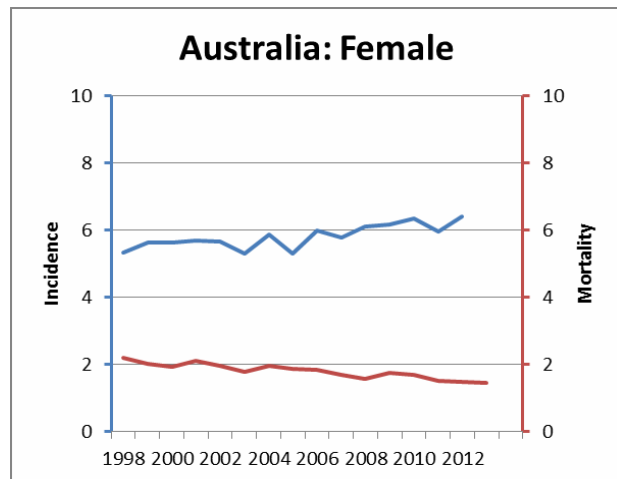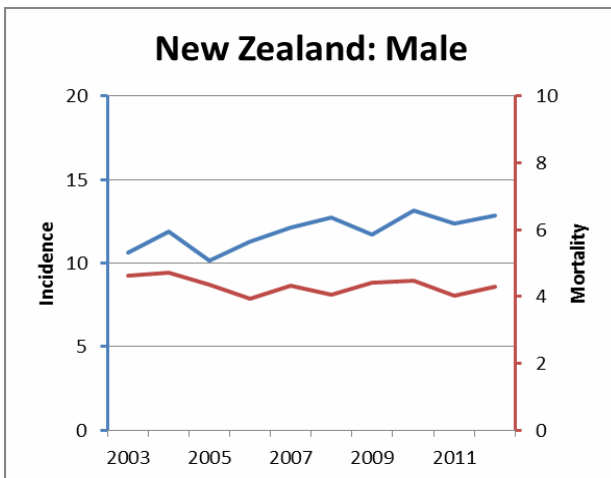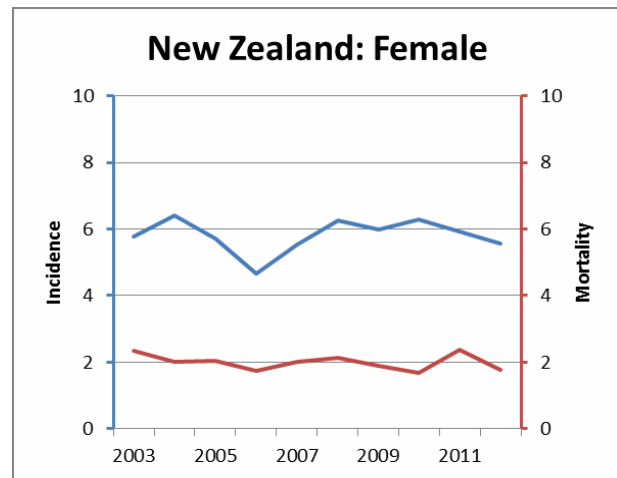

## 5). Northern Europe

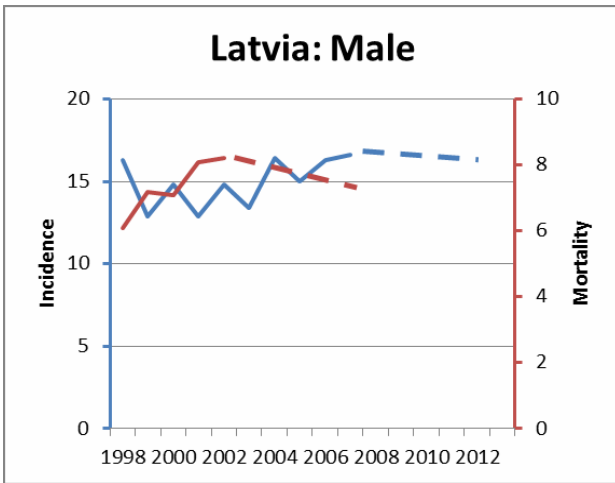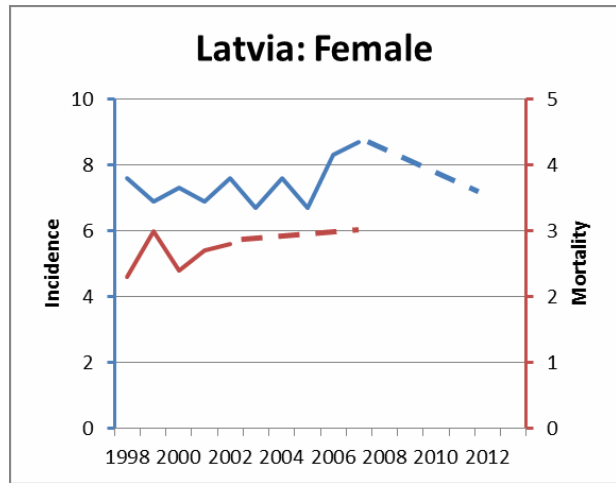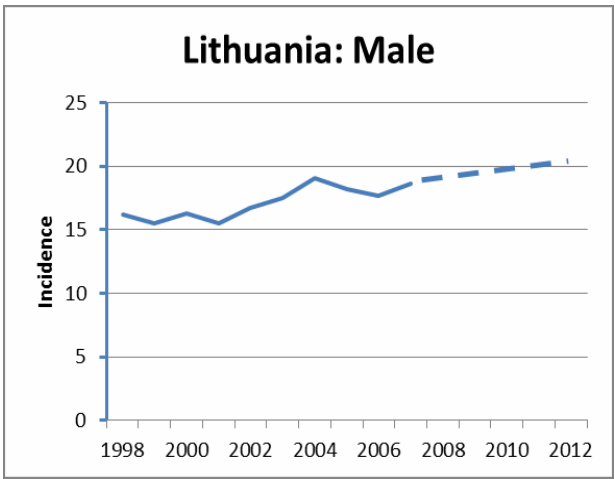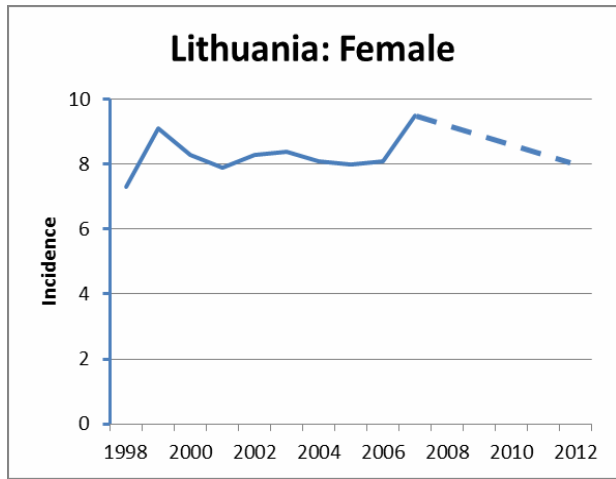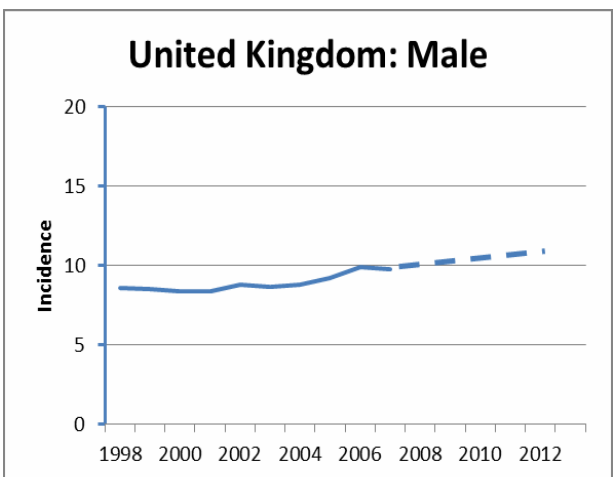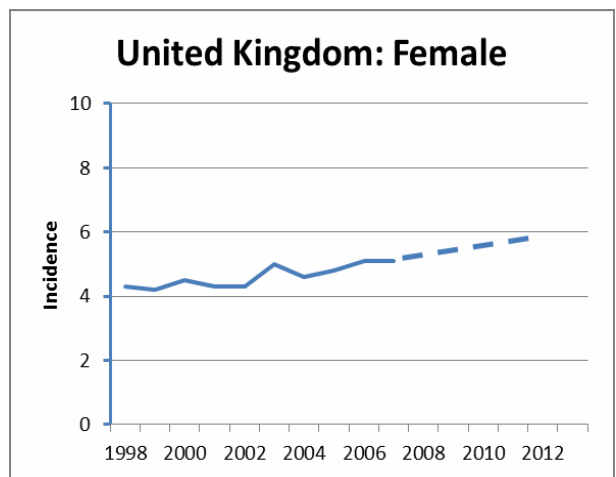

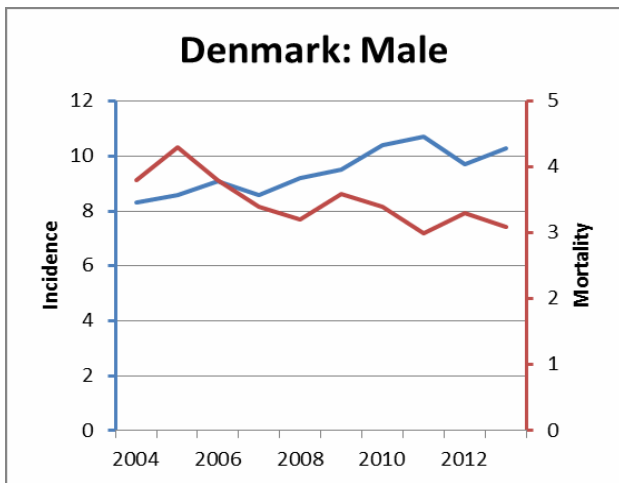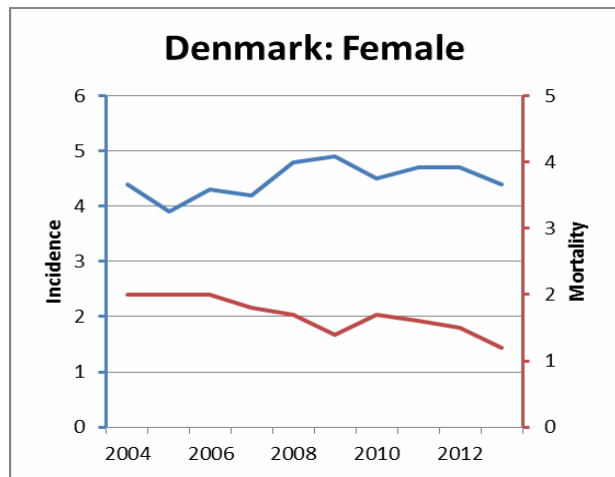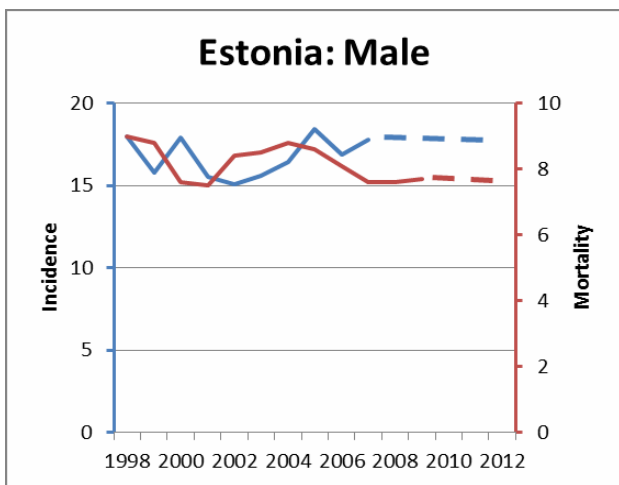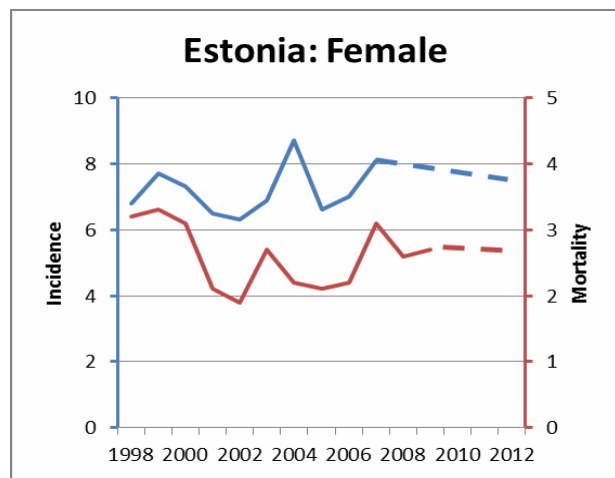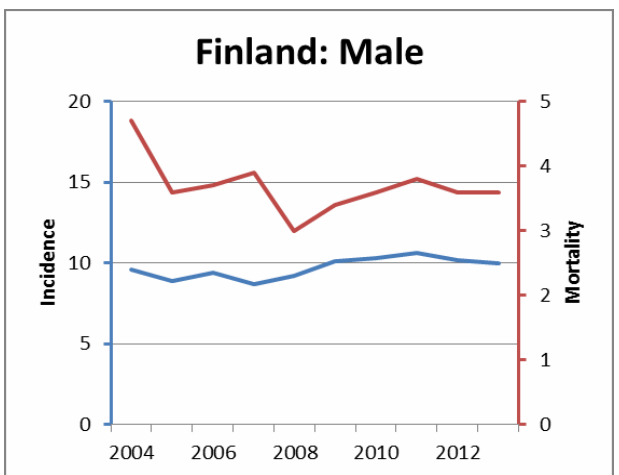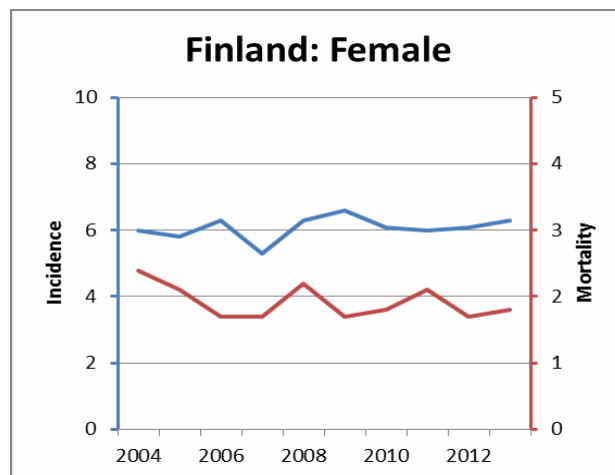



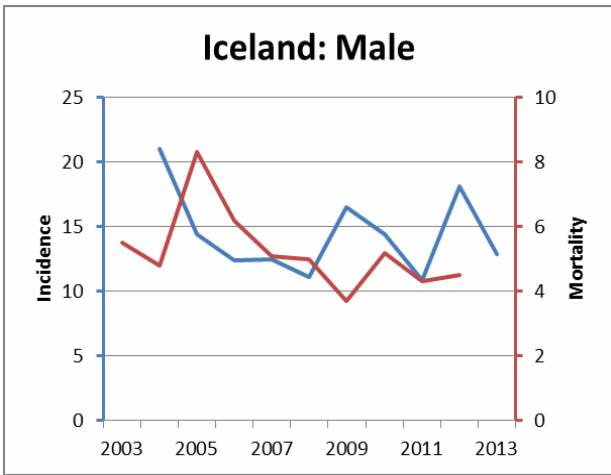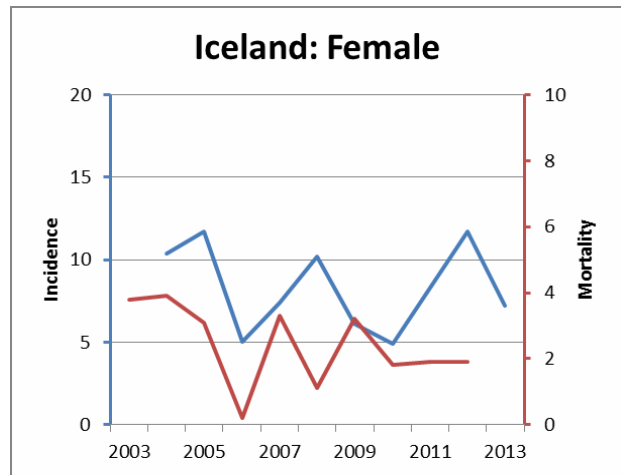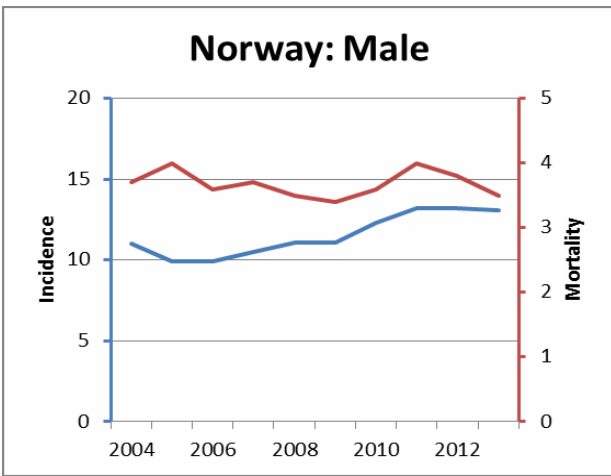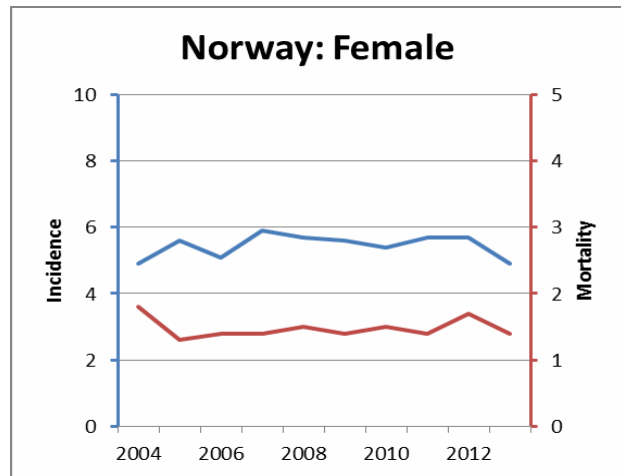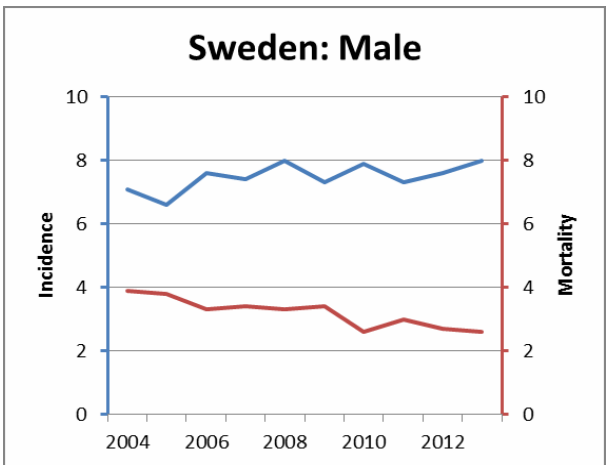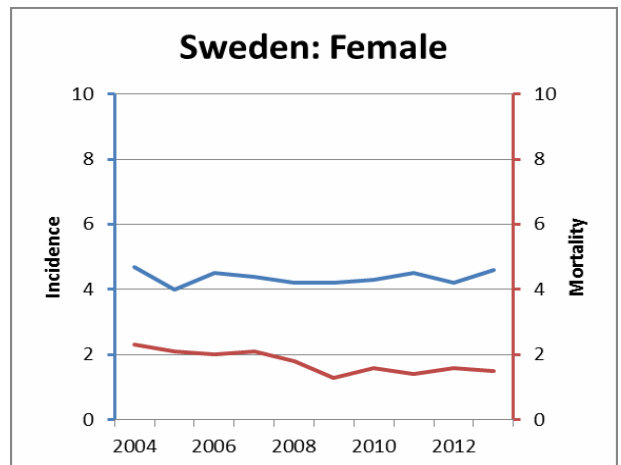

## 6). Western Europe

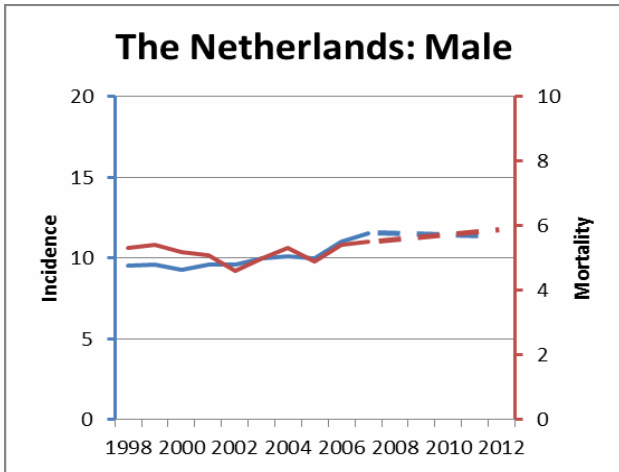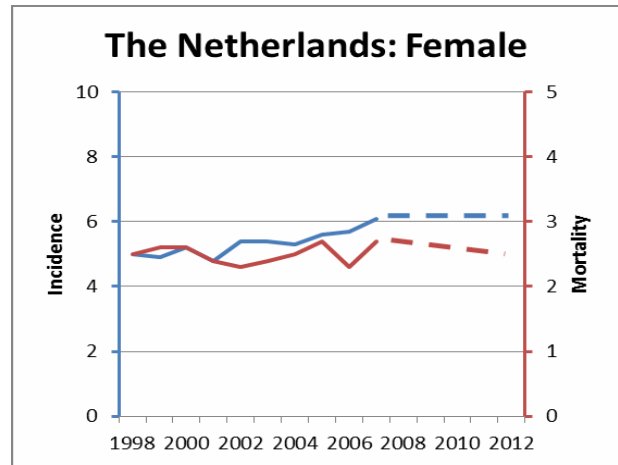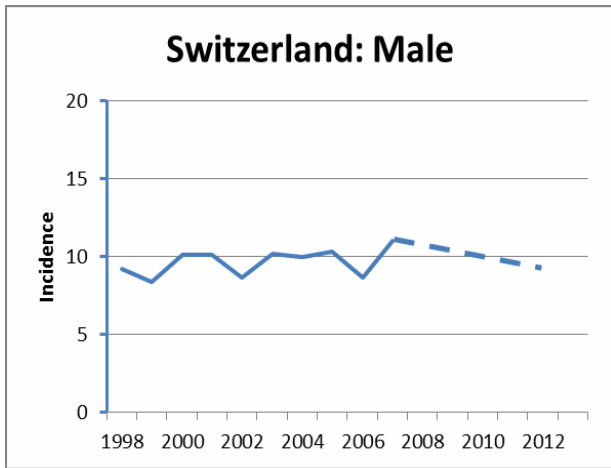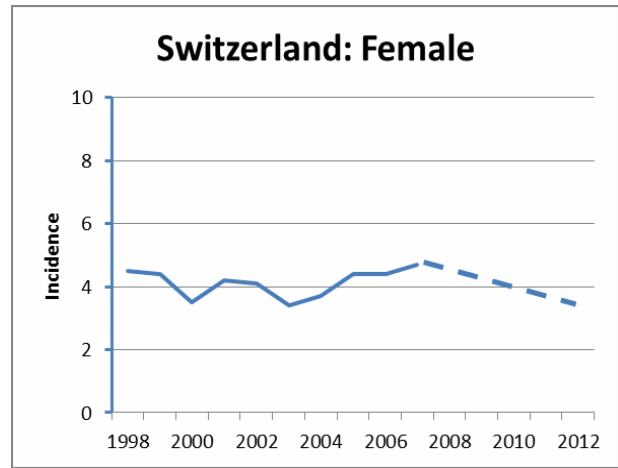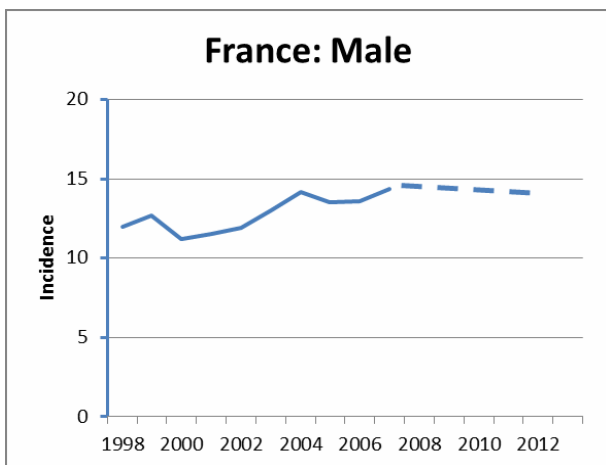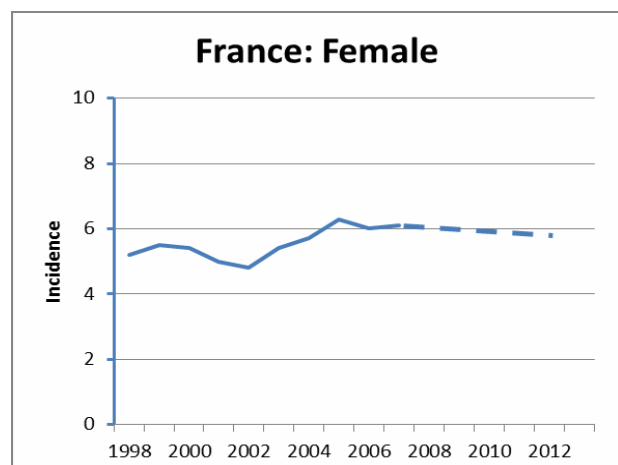

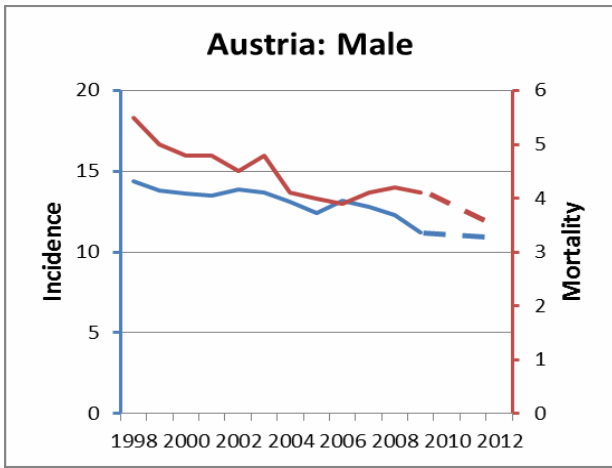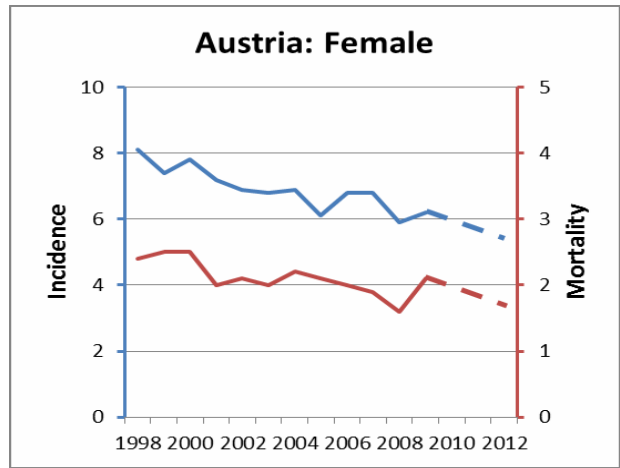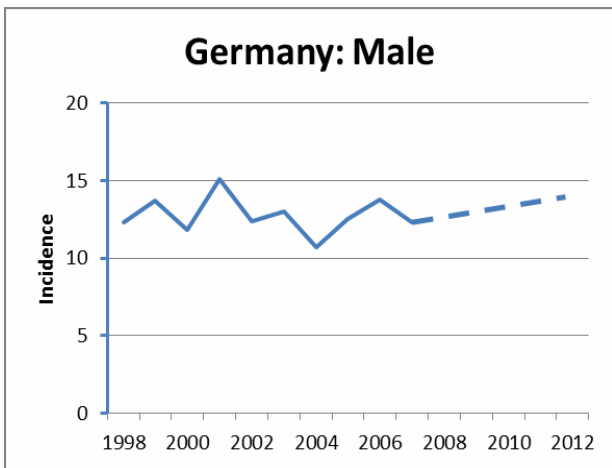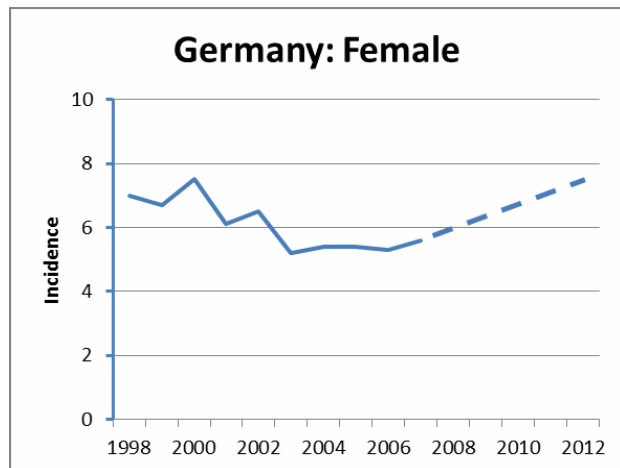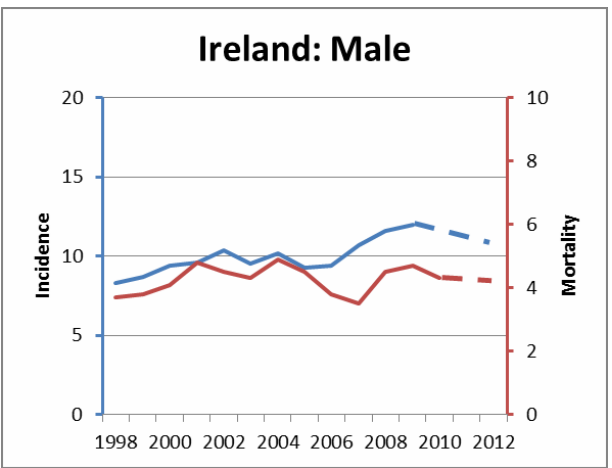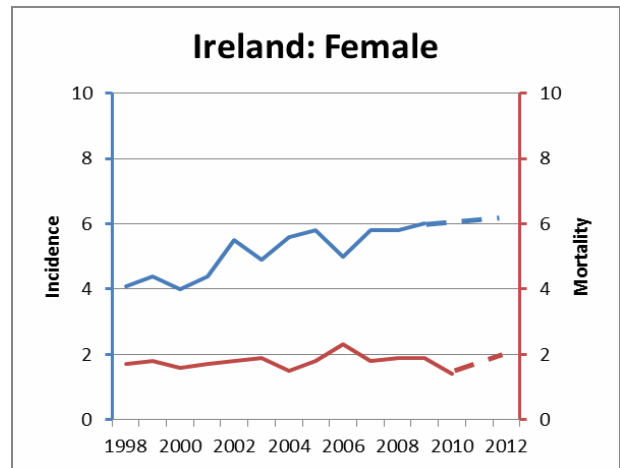

## 7). Southern Europe

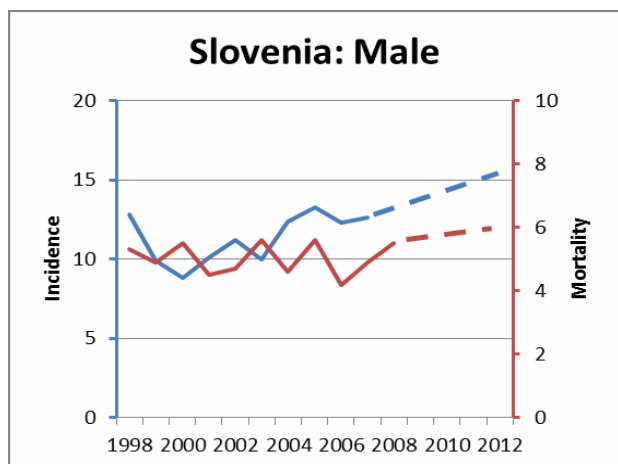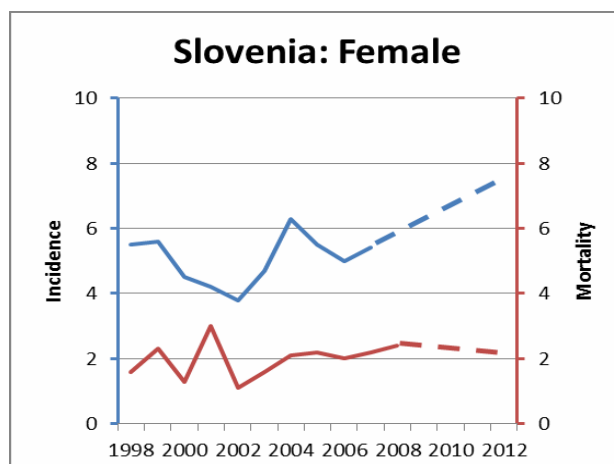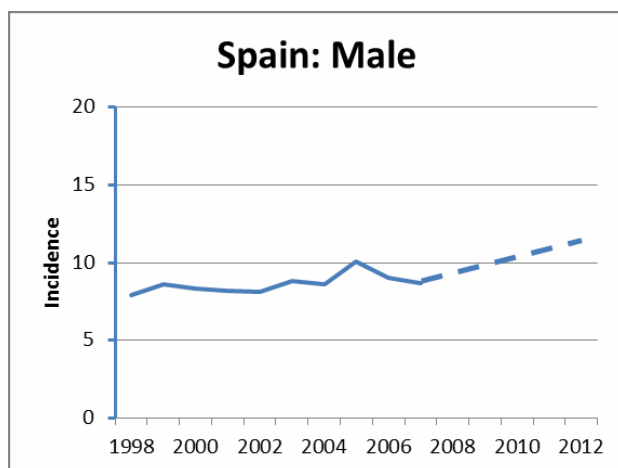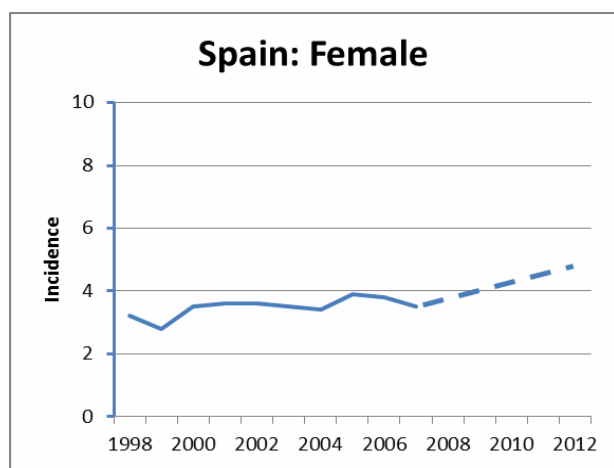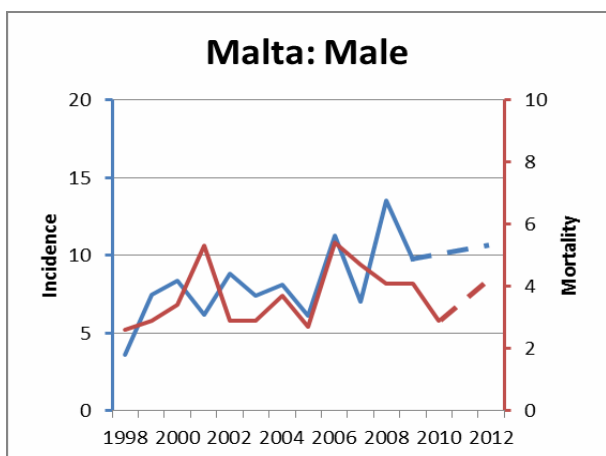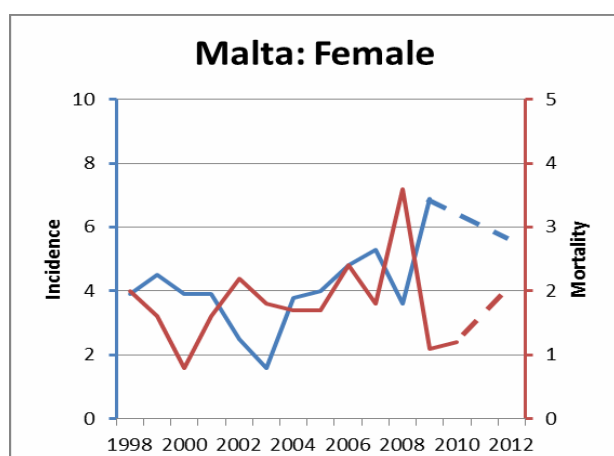

### Italy: Male

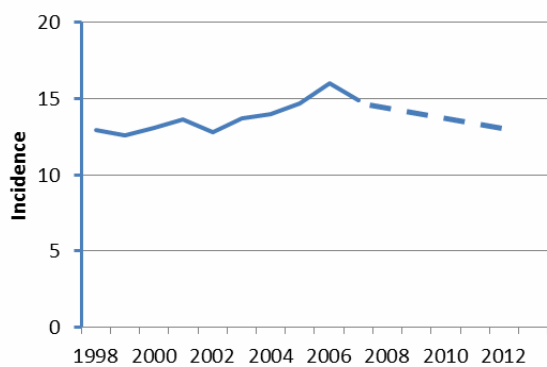

### Italy: Female

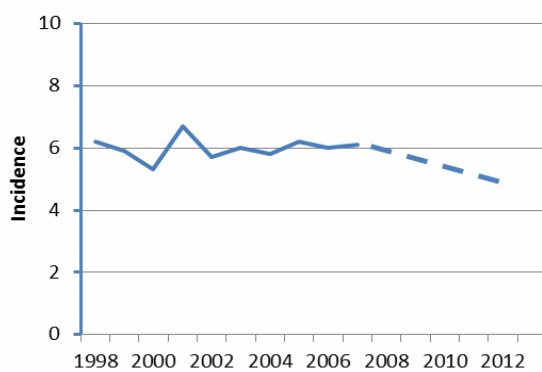

### Croatia: Male

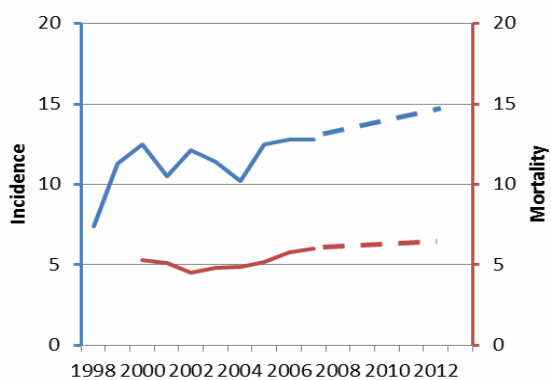

### Croatia: Female

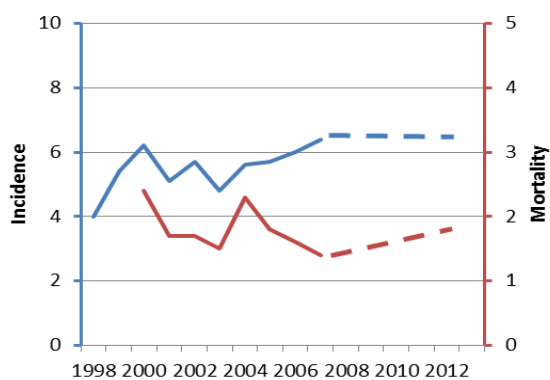

## 8). Eastern Europe

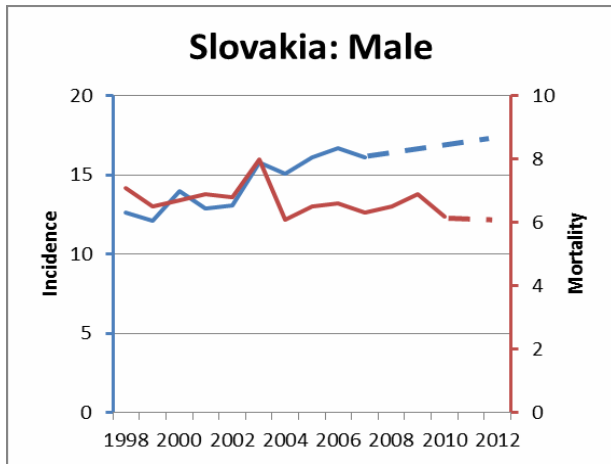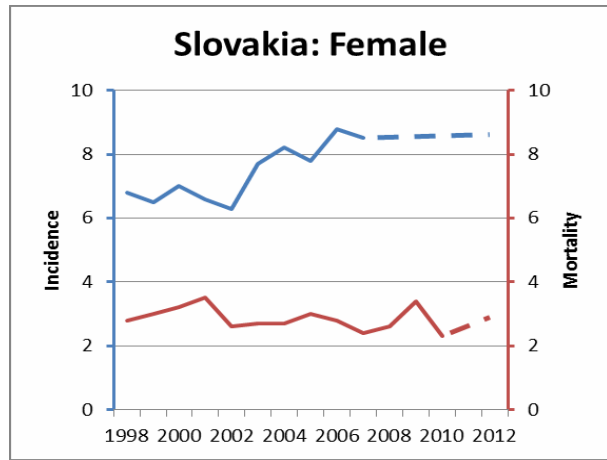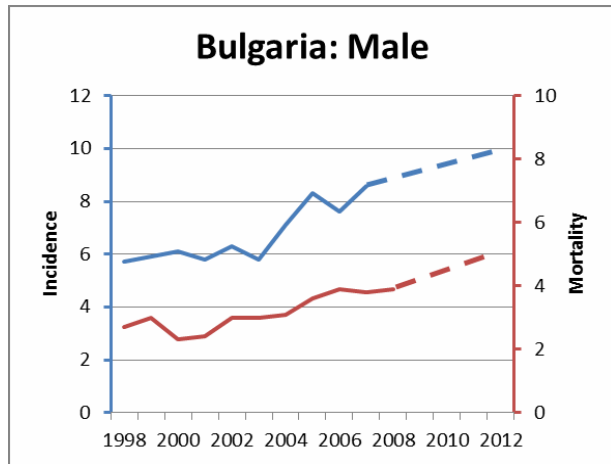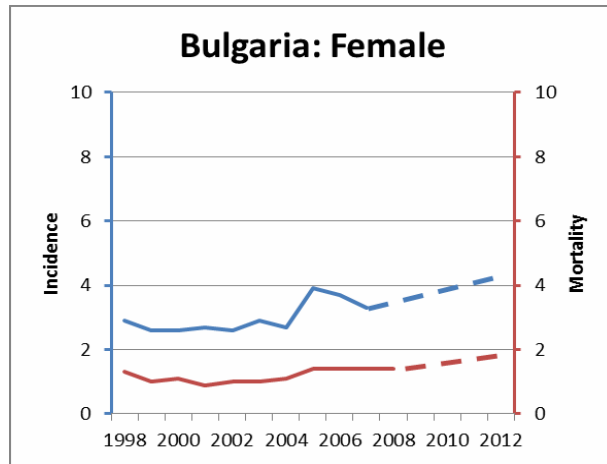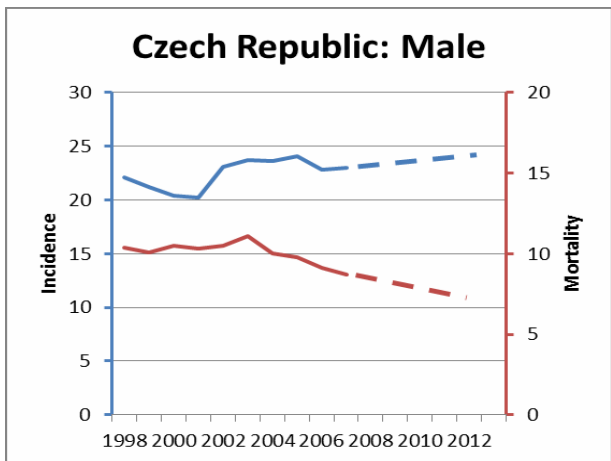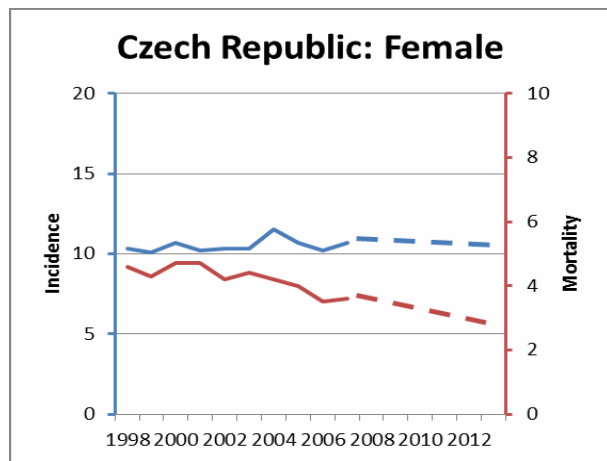

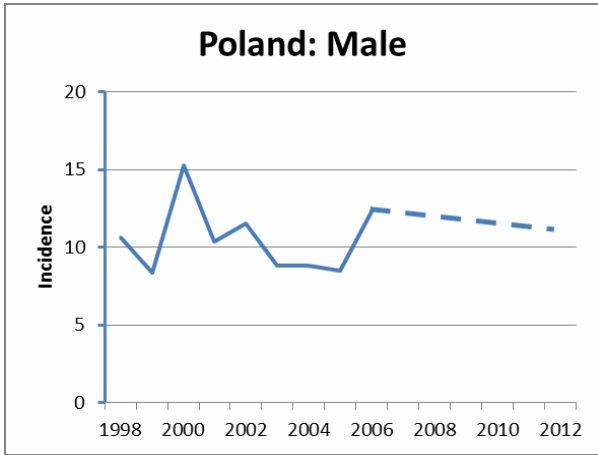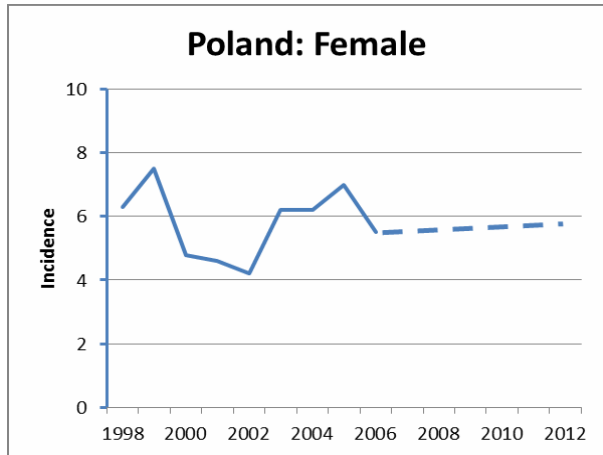

## Supplementary Figure 2 Findings from the joinpoint regression analysis of the global incidence rates of kidney cancer (Left: Male, Right: Female)

### 1) Latin America and the Caribbean

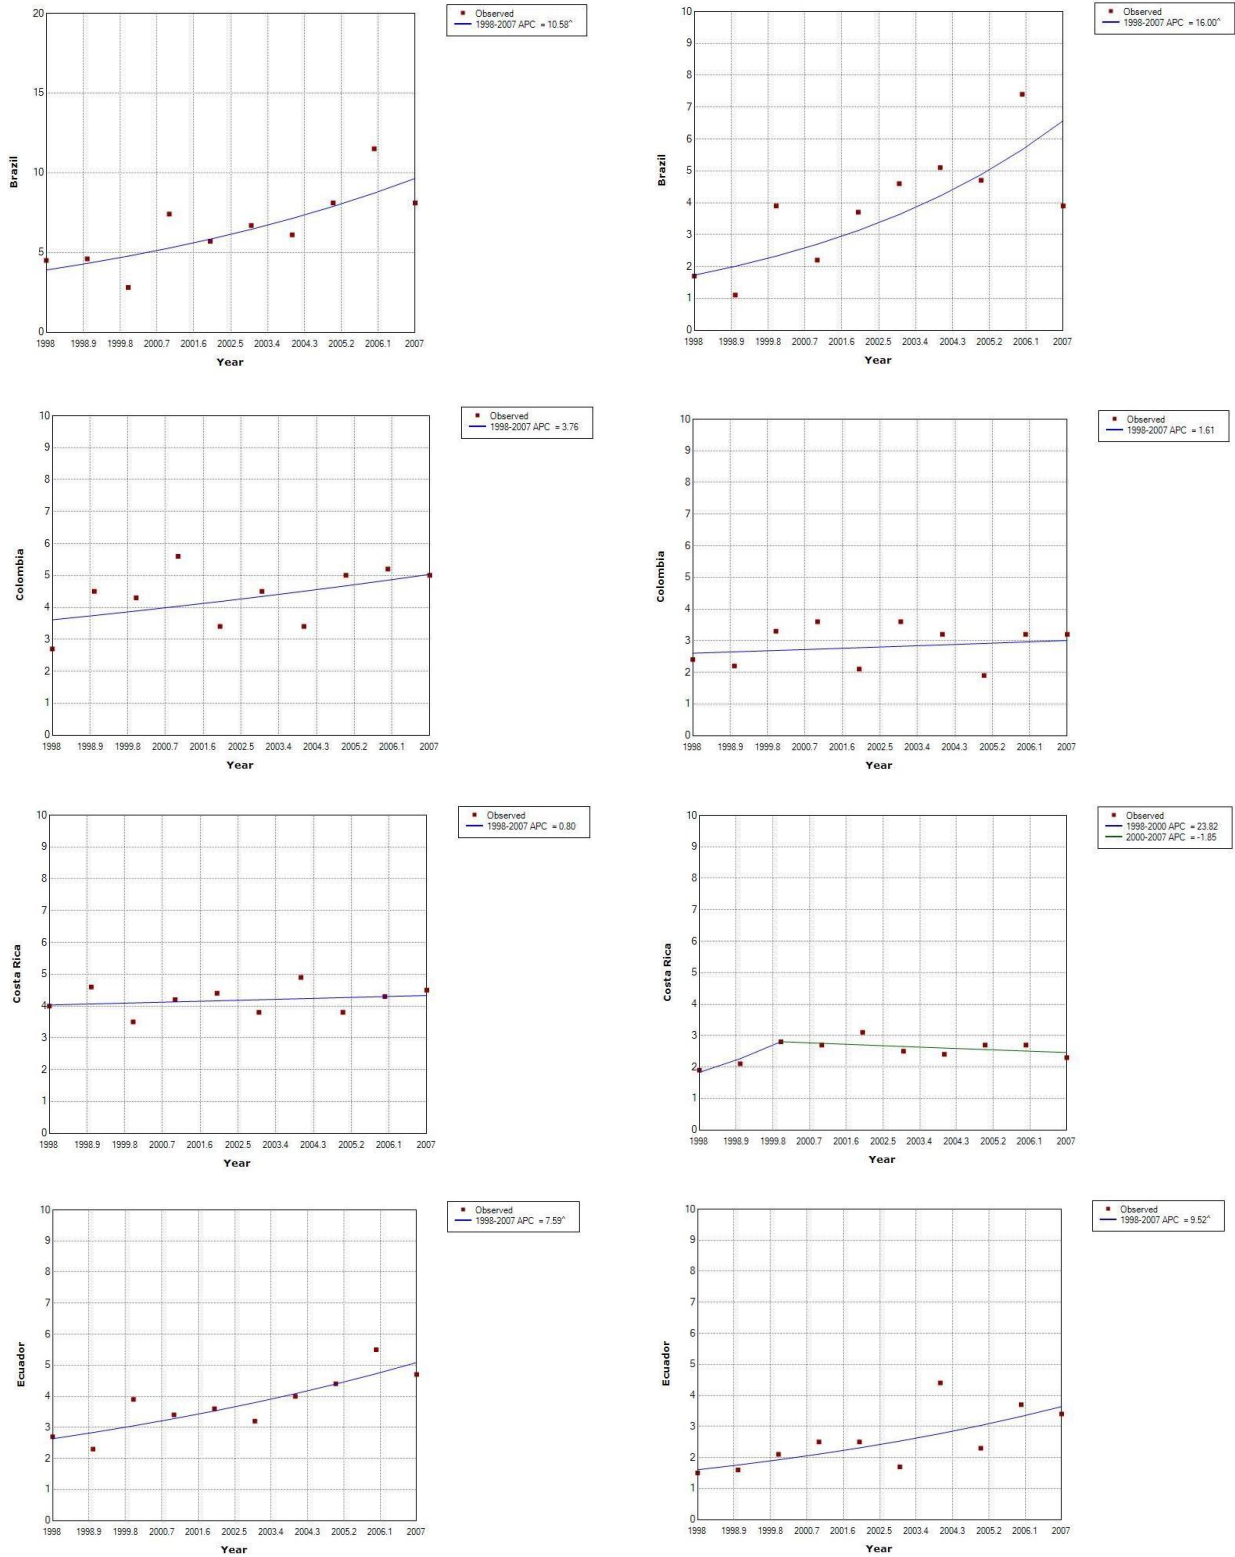



## 2) Northern America

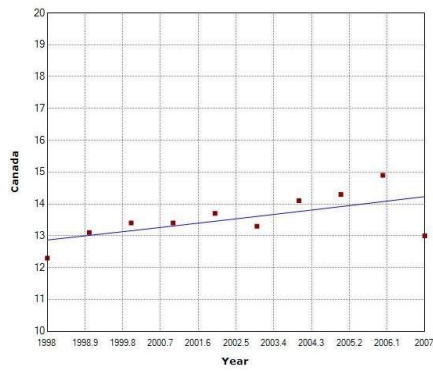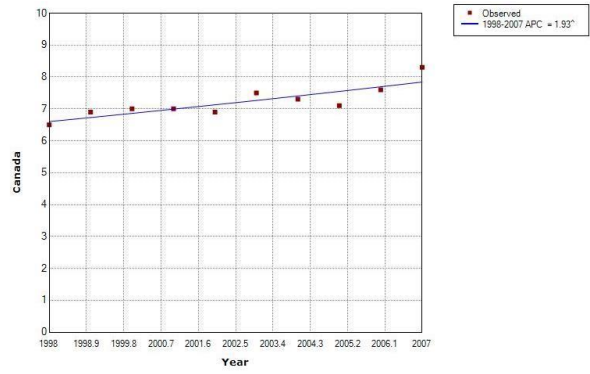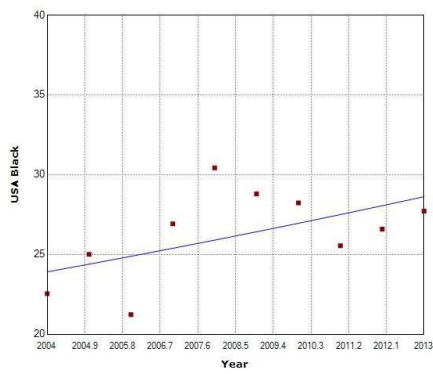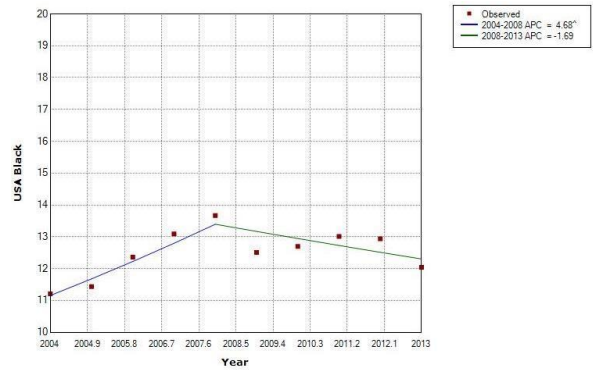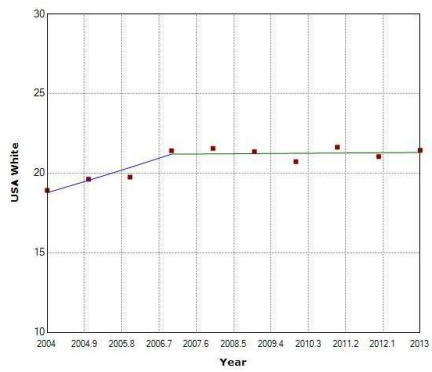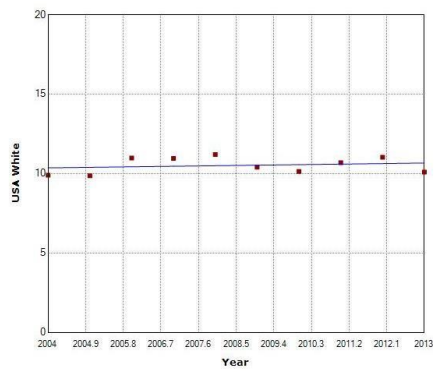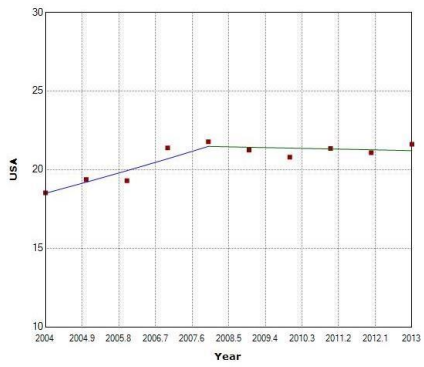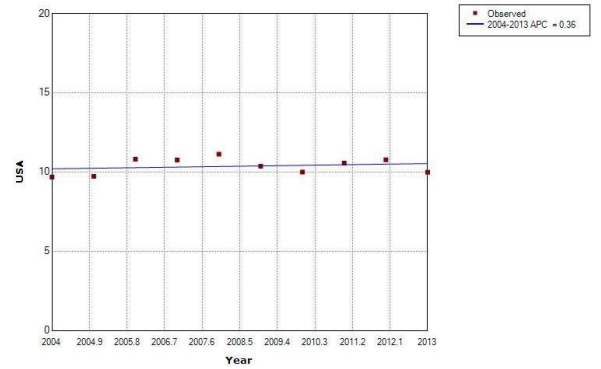

### 3) Asia

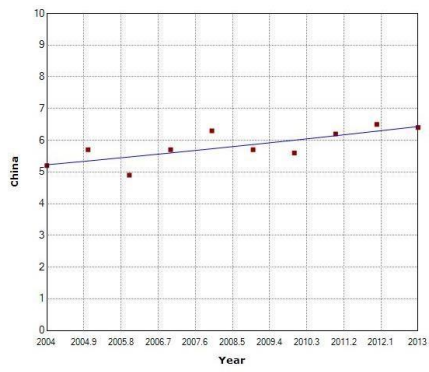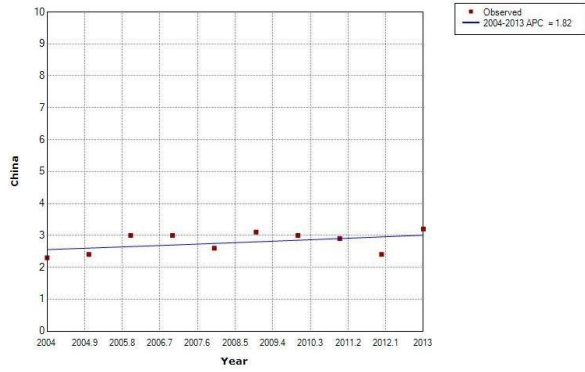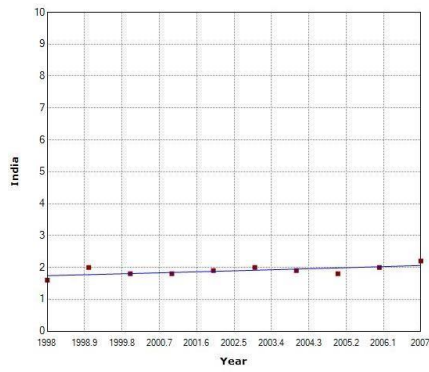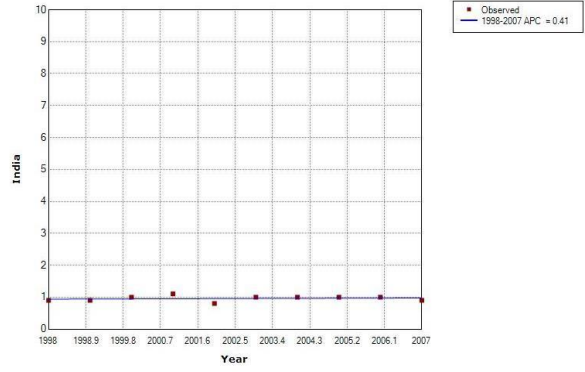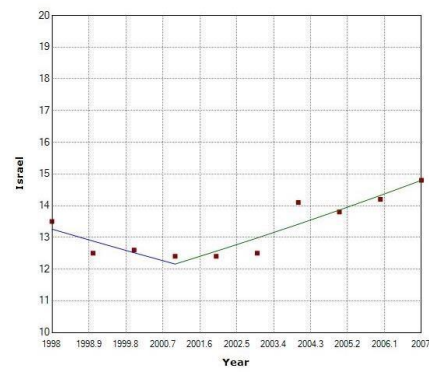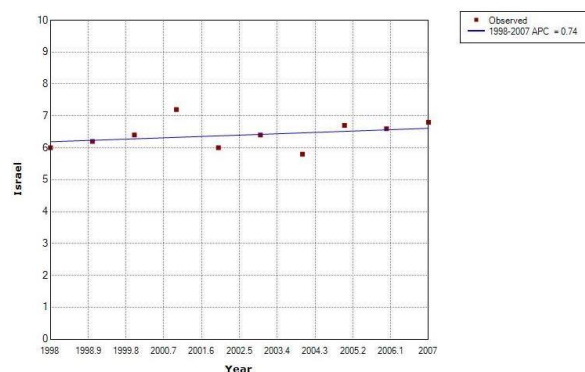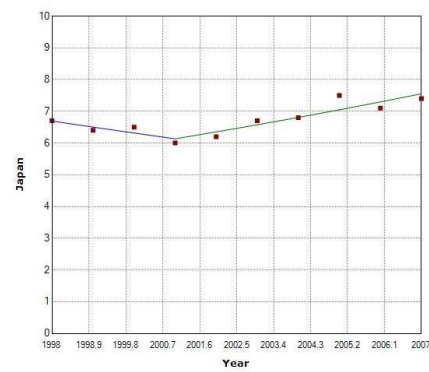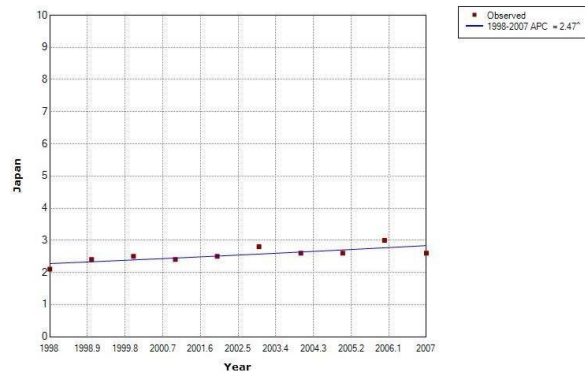

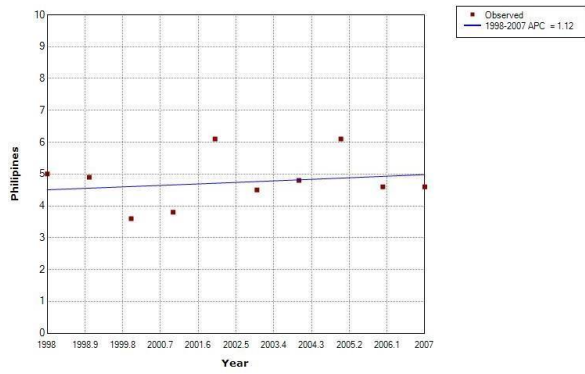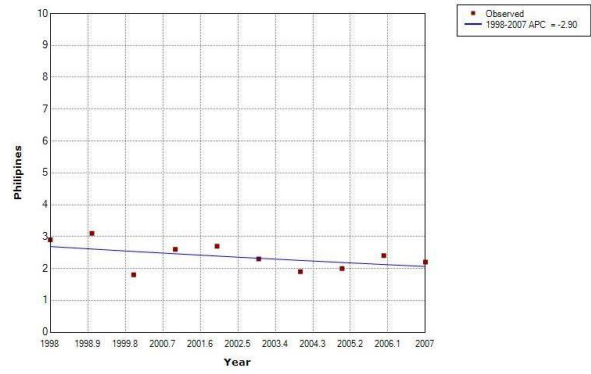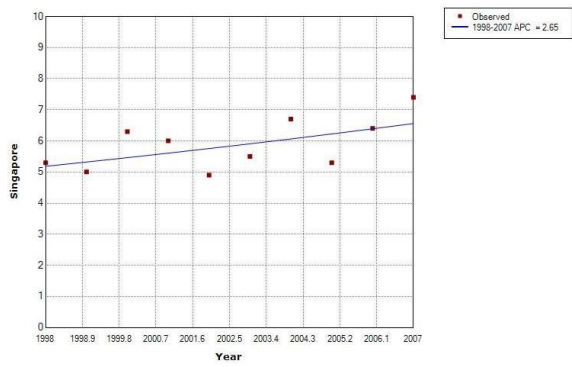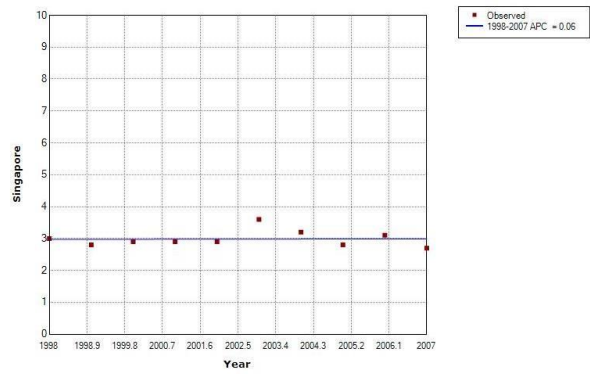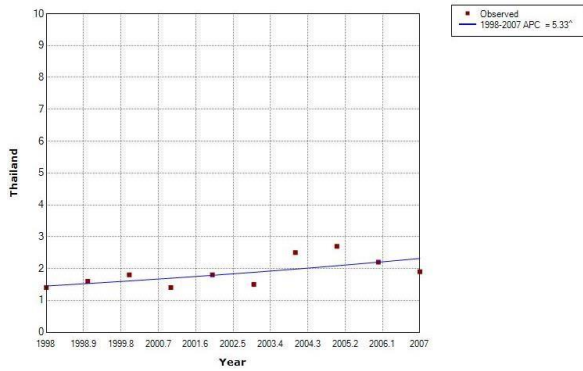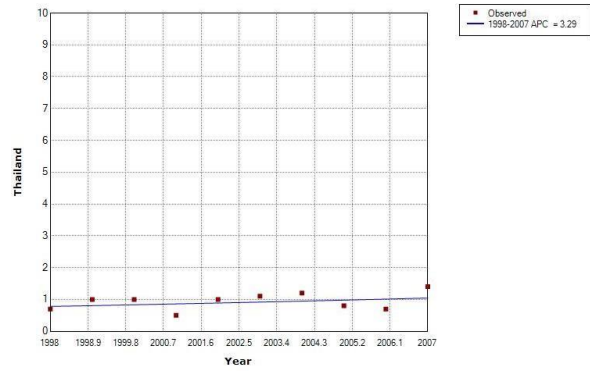

#### 4) Oceania

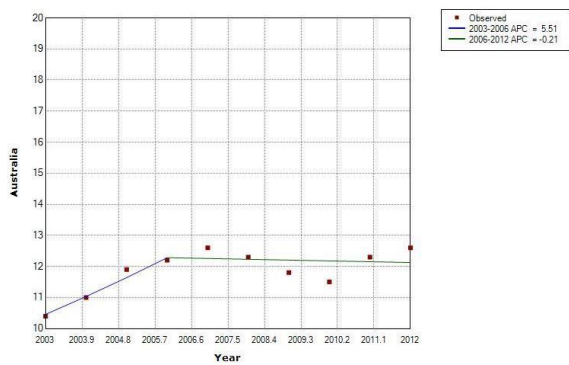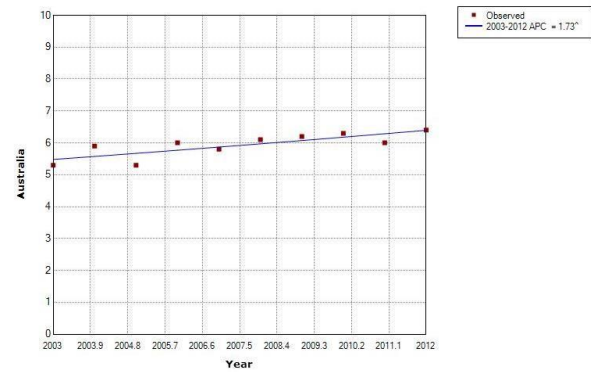

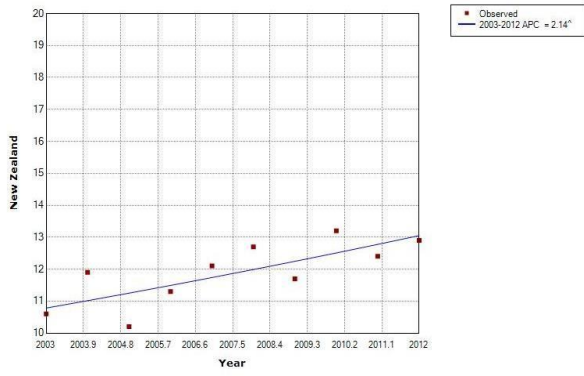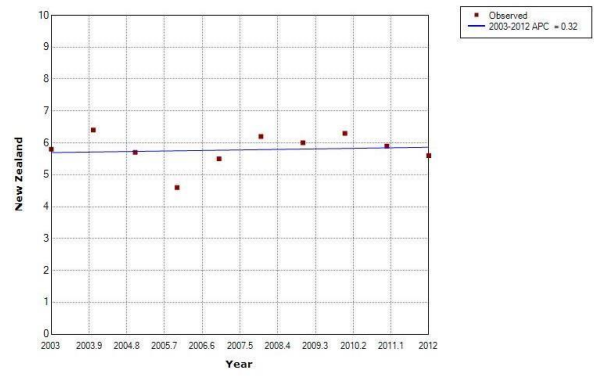

## 5). Northern Europe

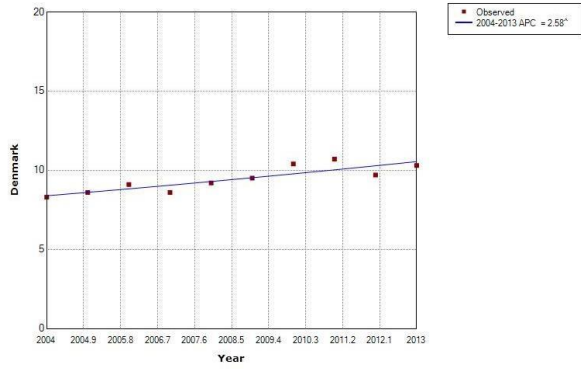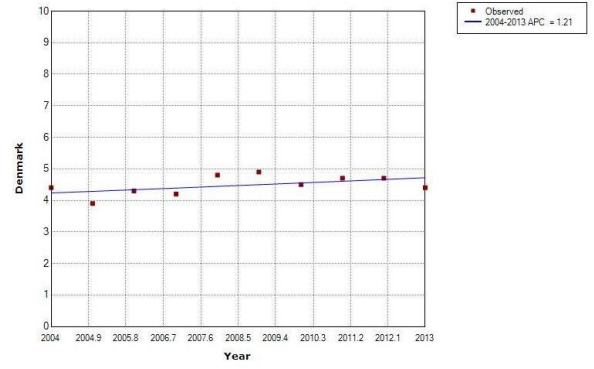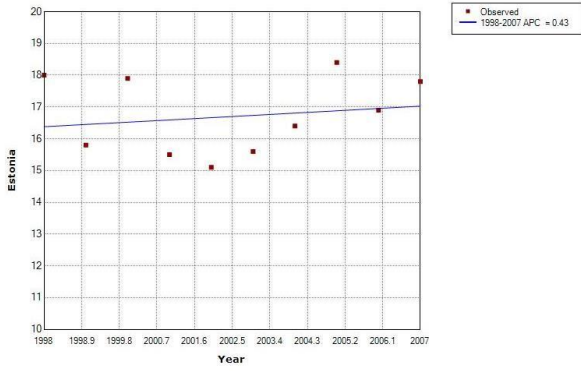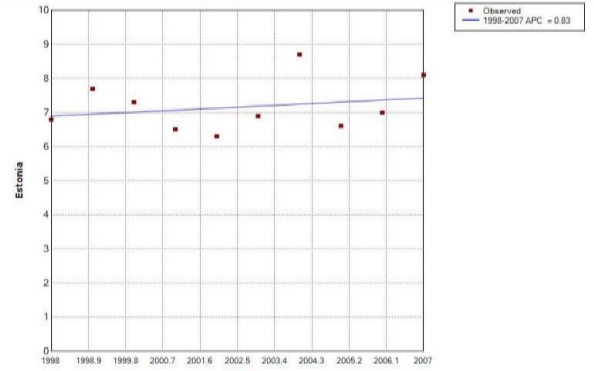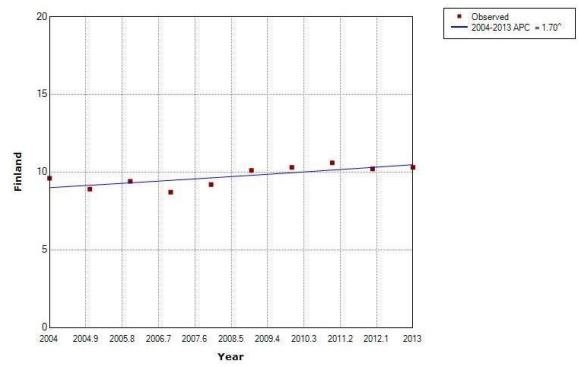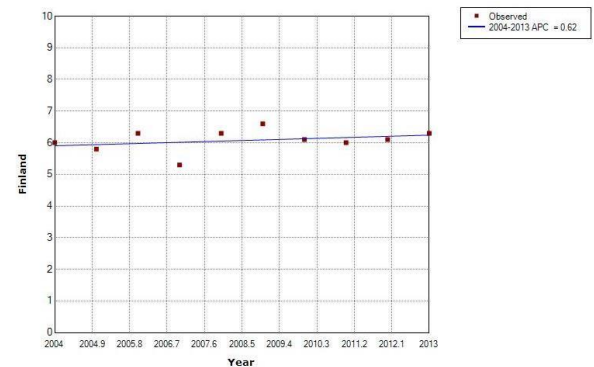



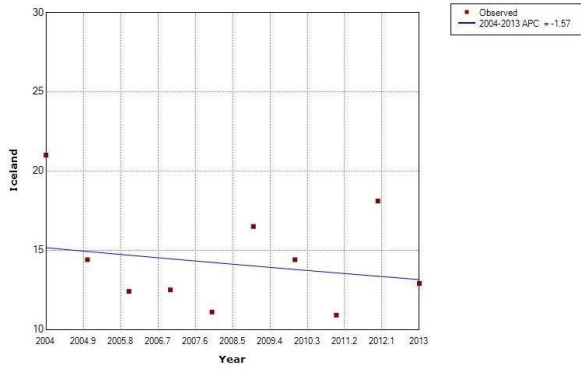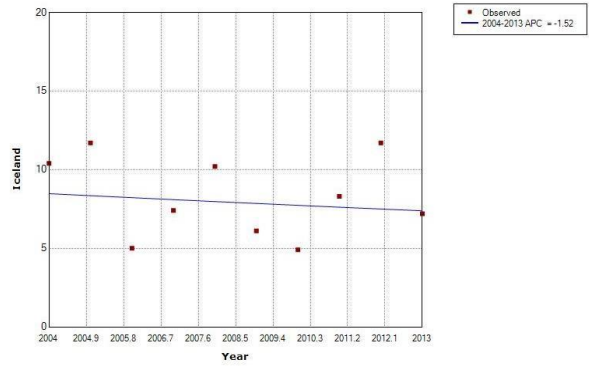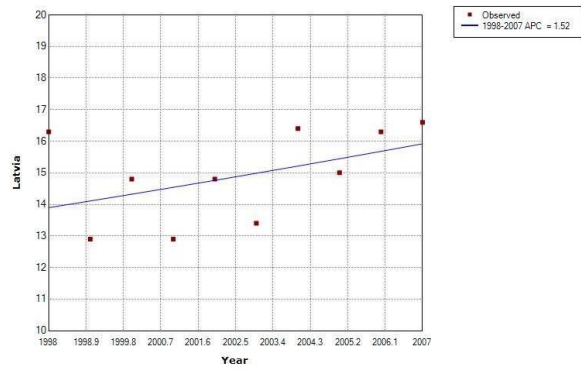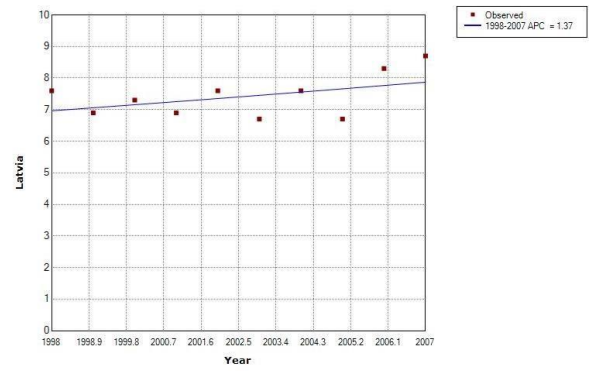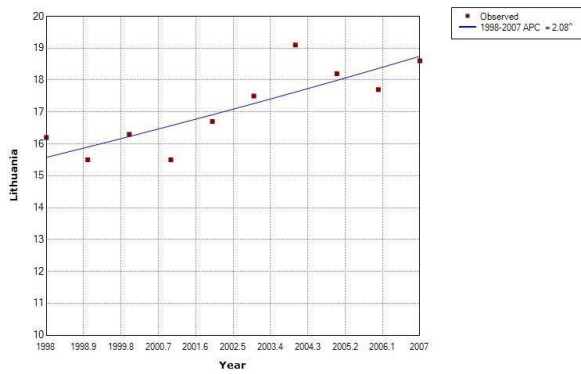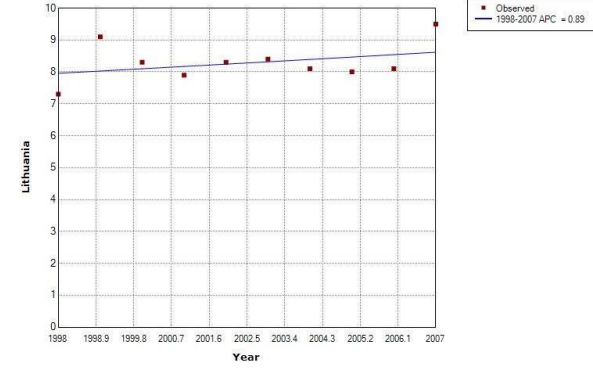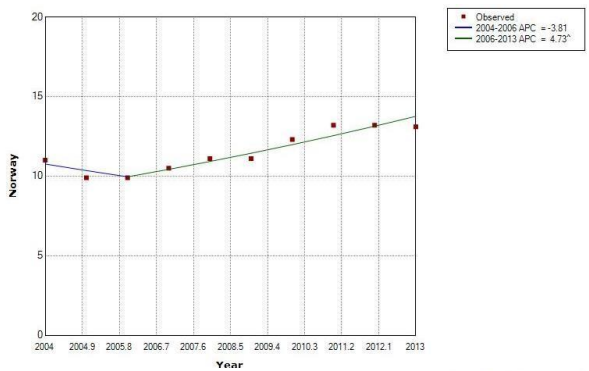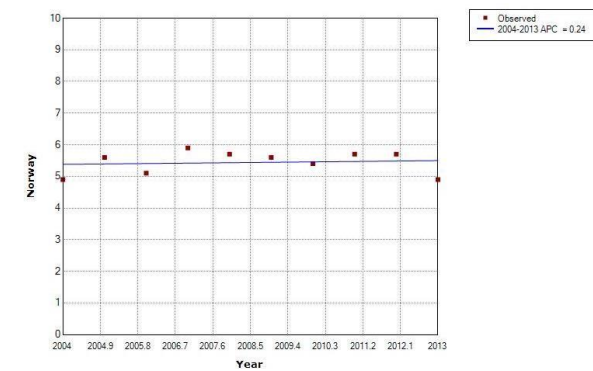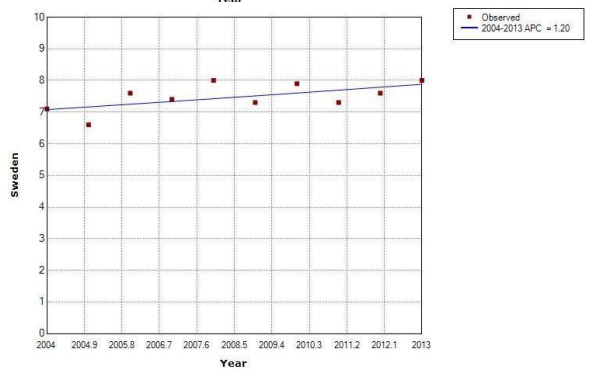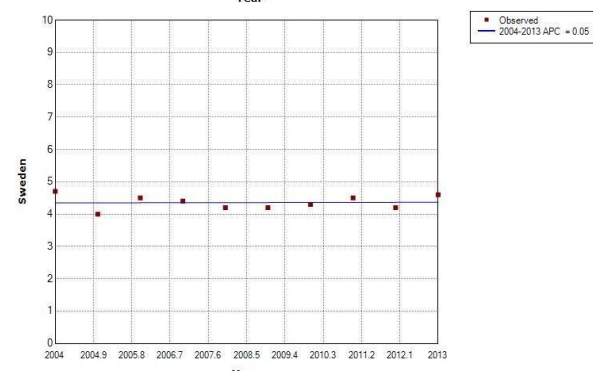

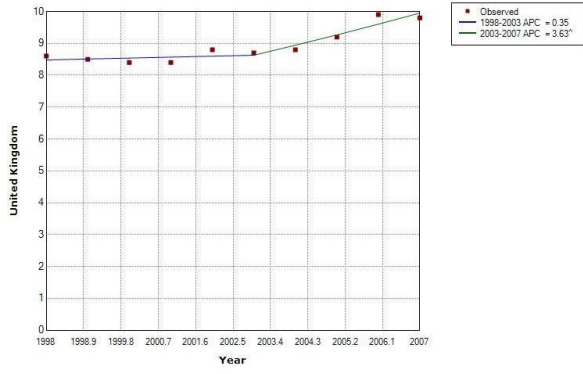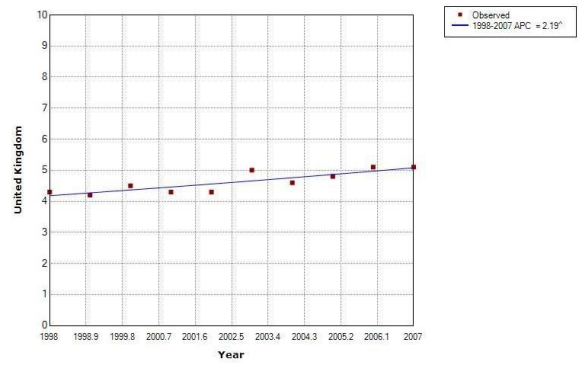

## 6) Western Europe

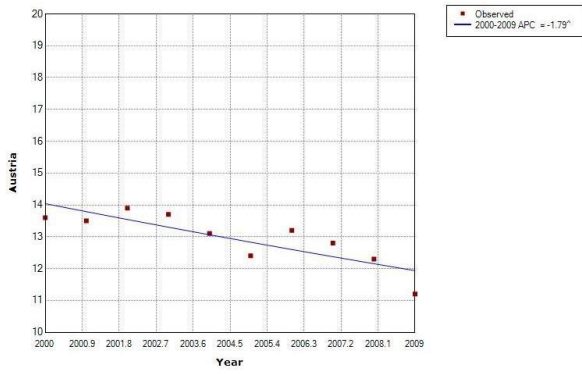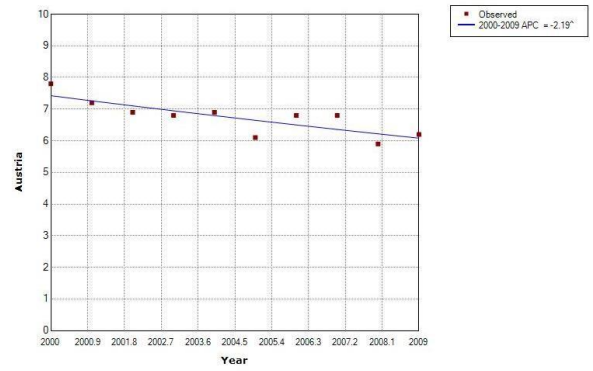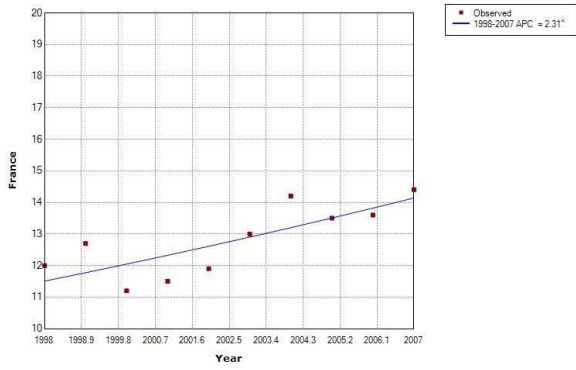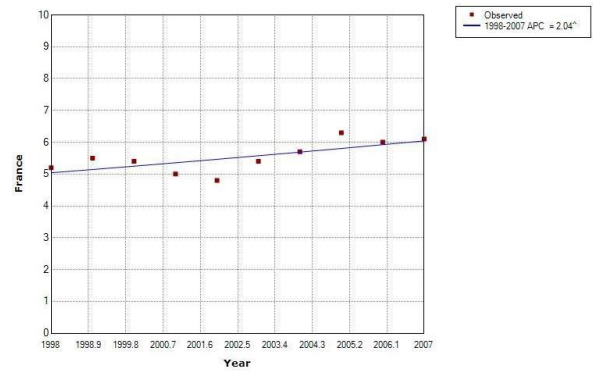

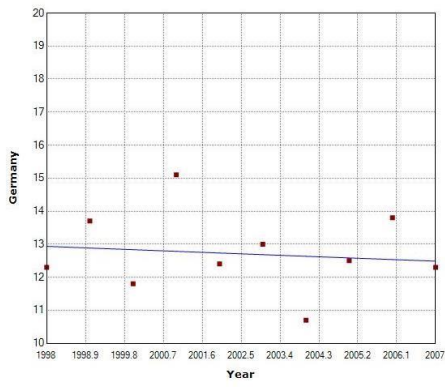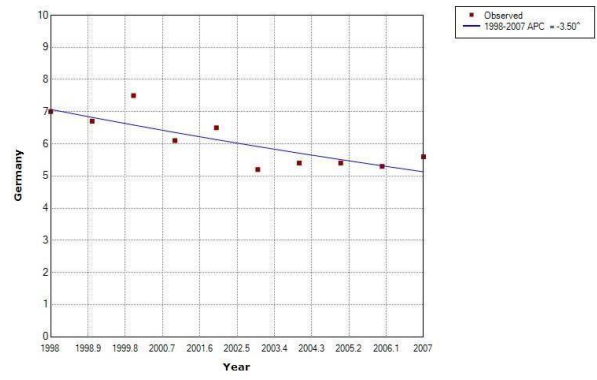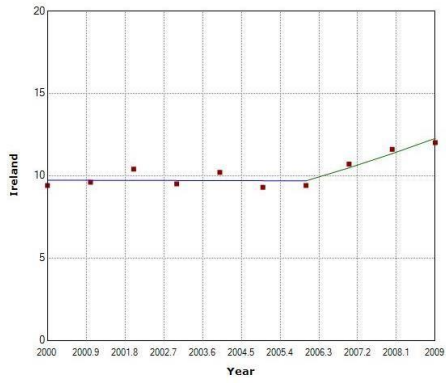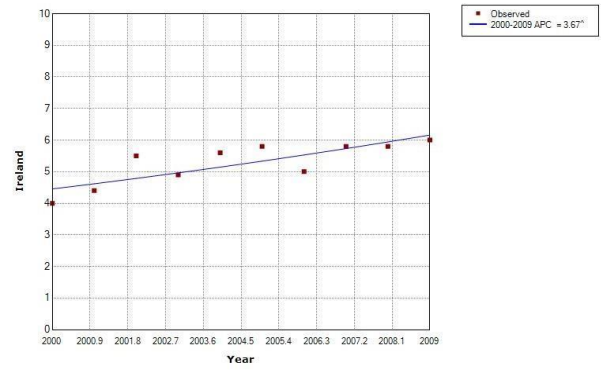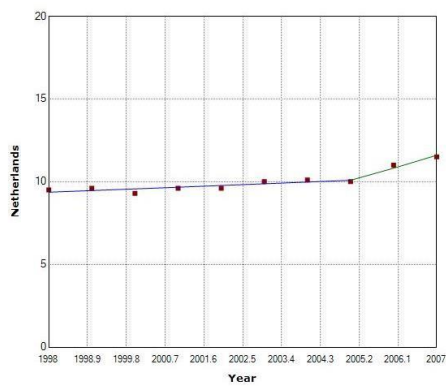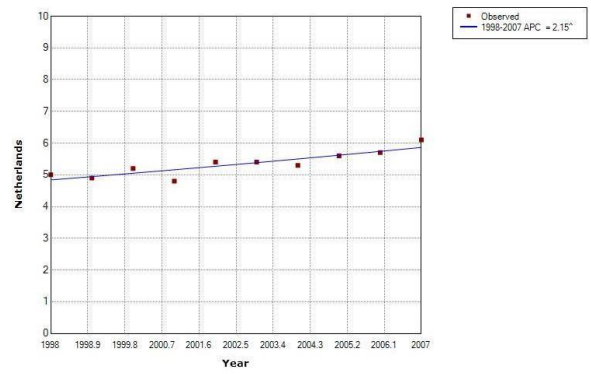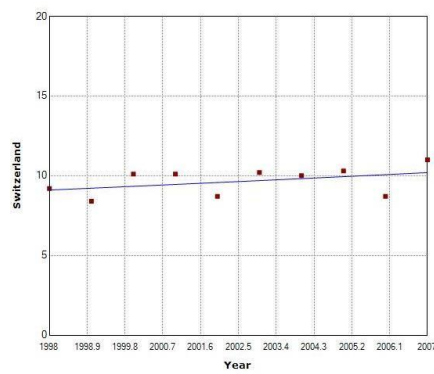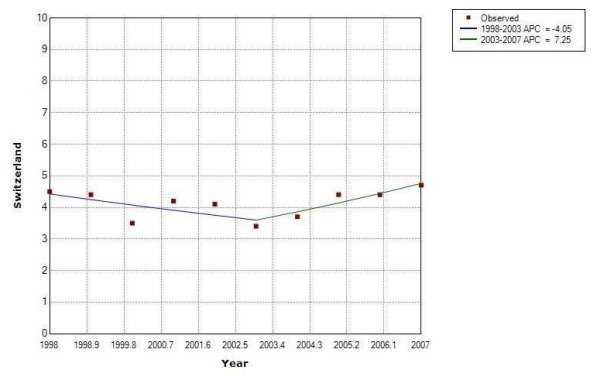

## 7) Southern Europe

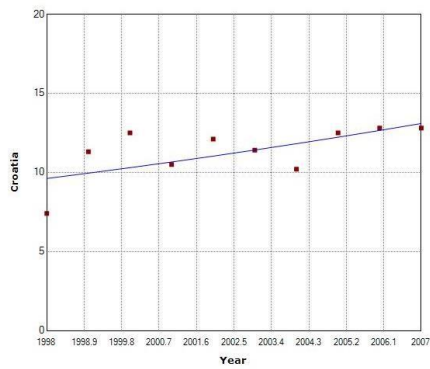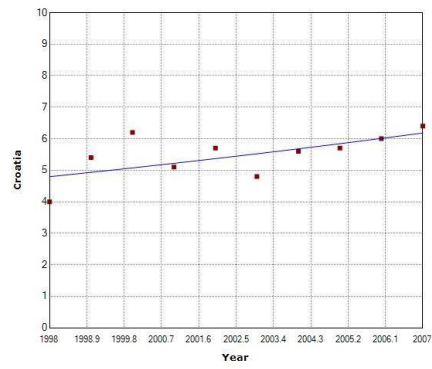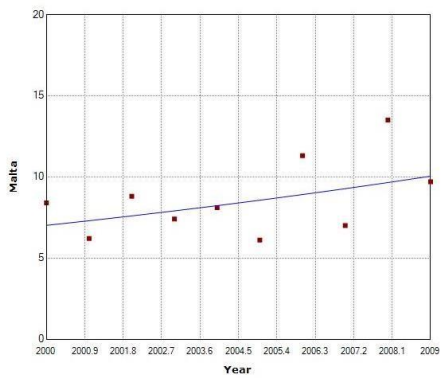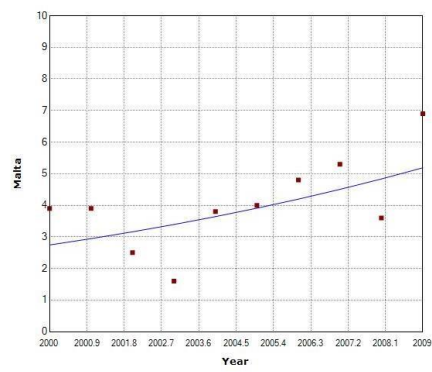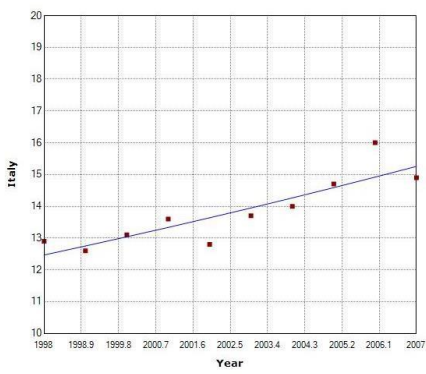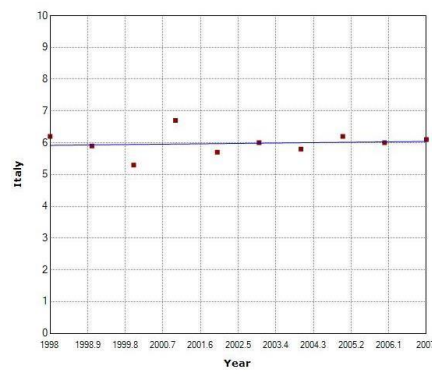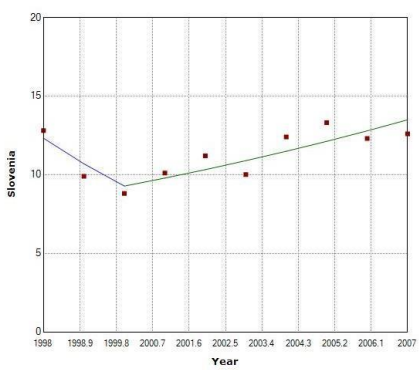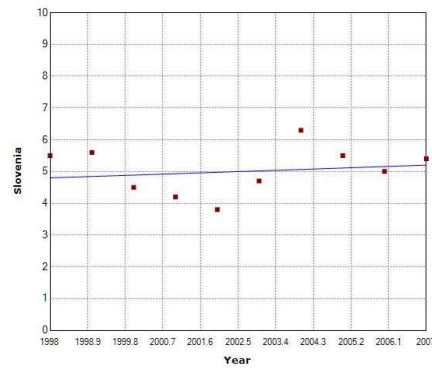



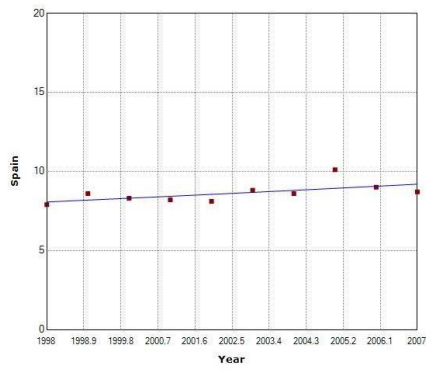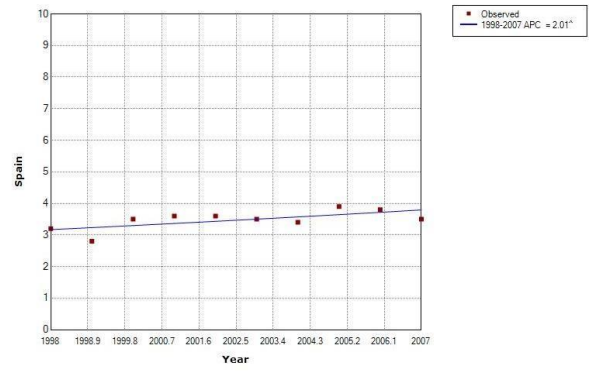

## 8) Eastern Europe

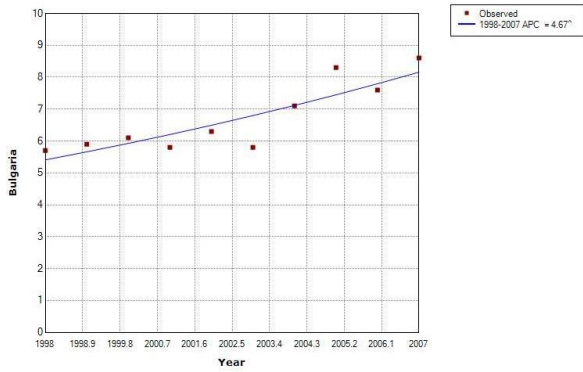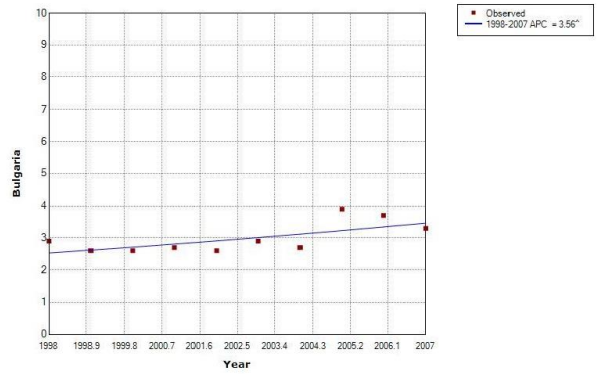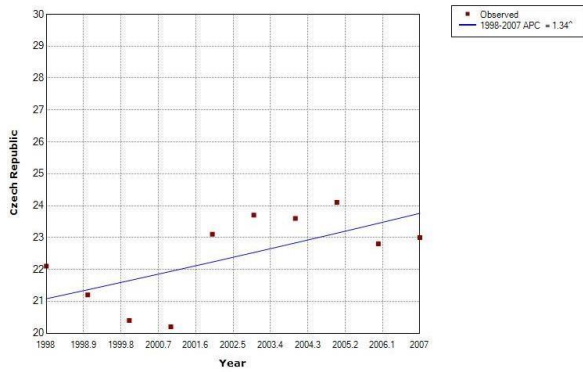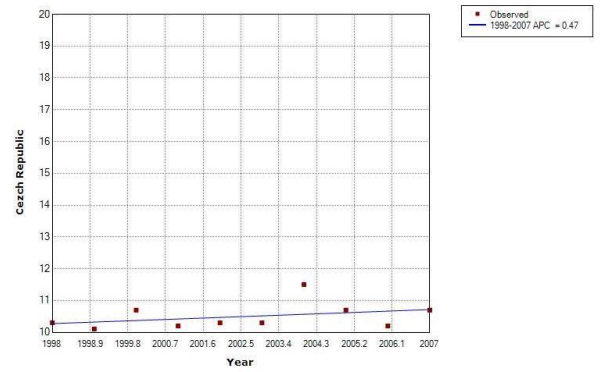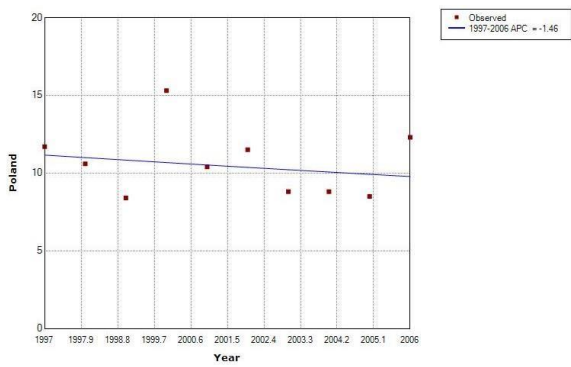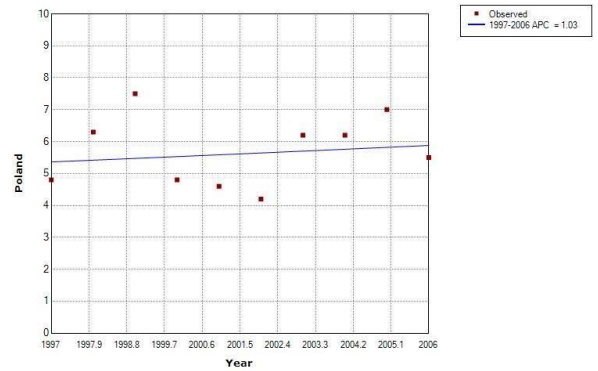

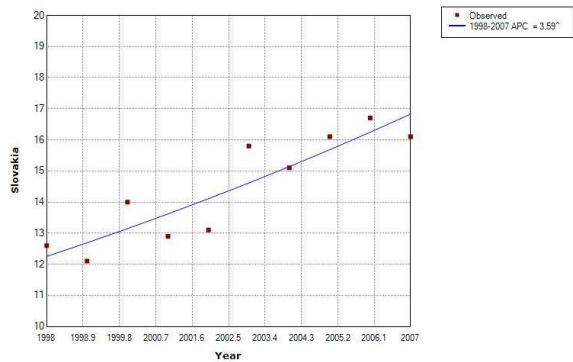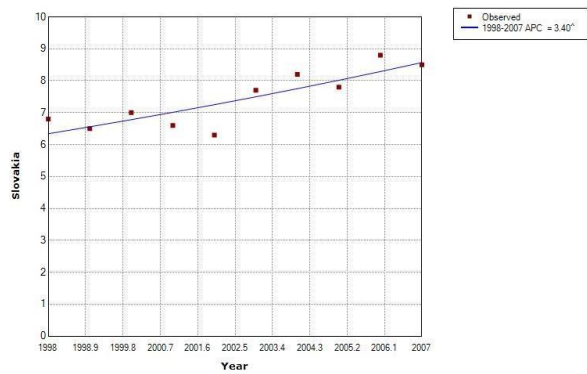

# Supplementary Figure 3 Findings from the joinpoint regression analysis of the global mortality rates of kidney cancer (Left: Male, Right: Female)

## 1) North America

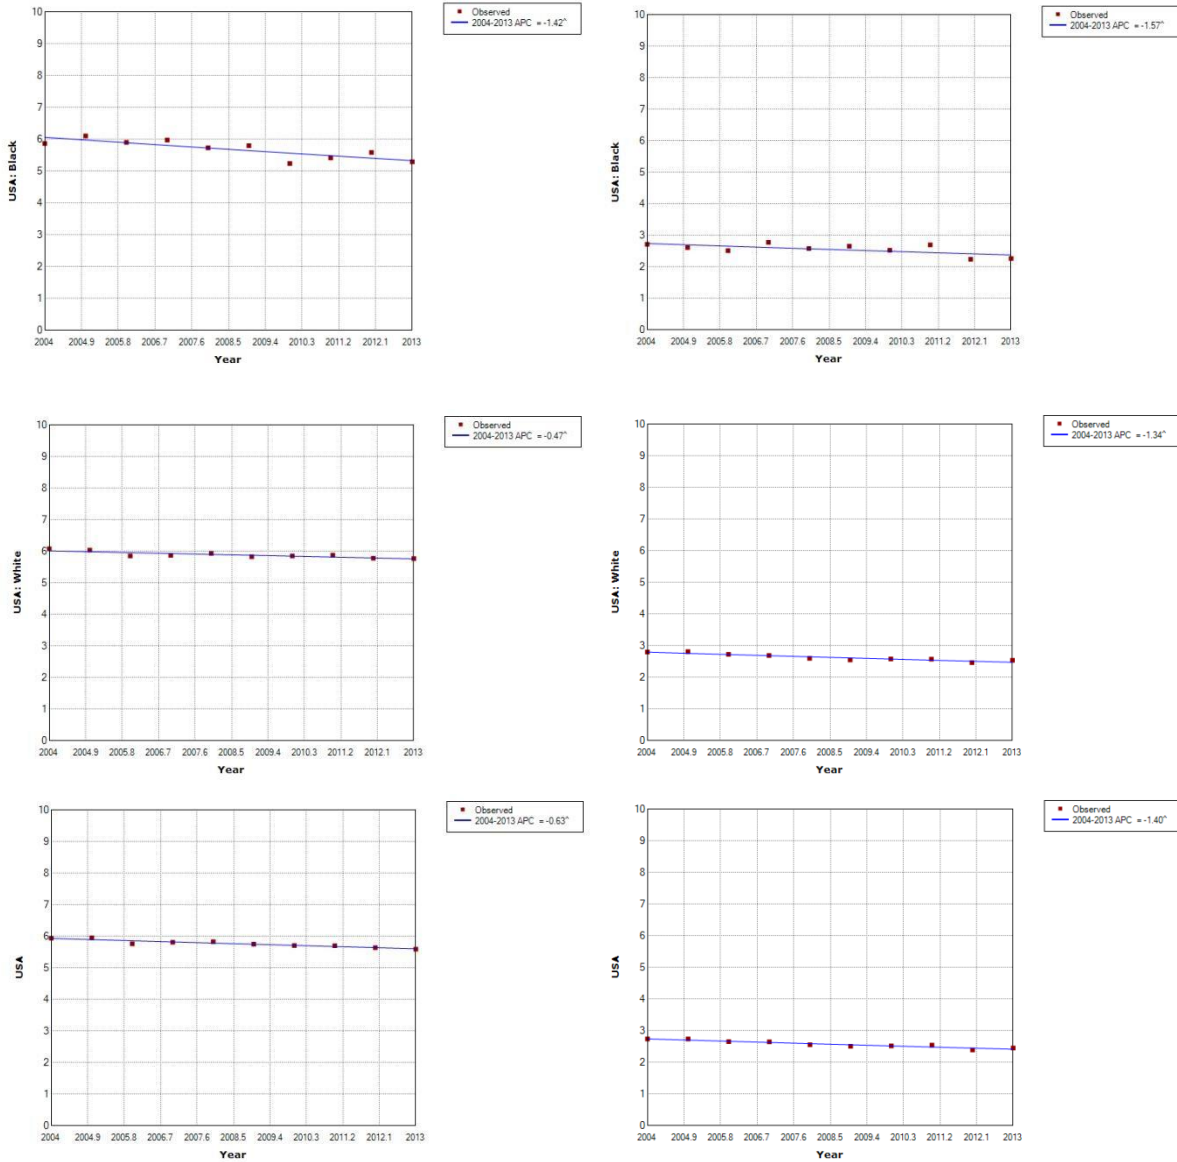

## 2) Asia

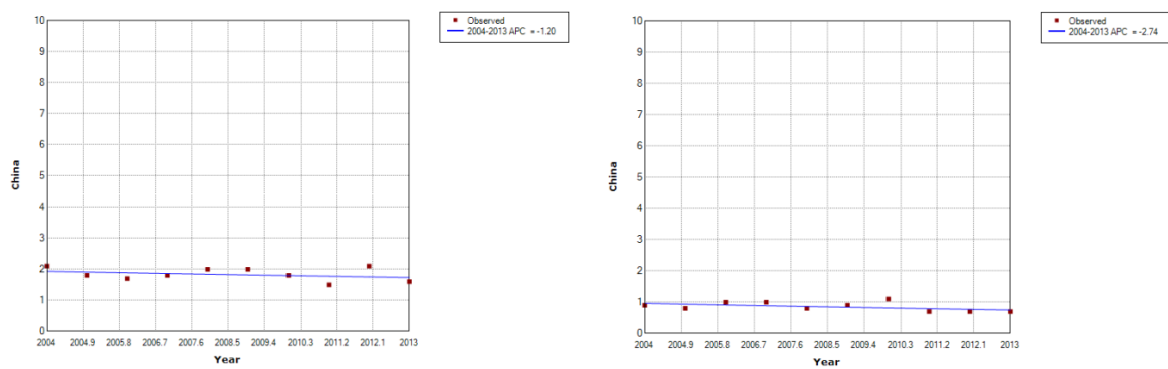

### 3) Oceania

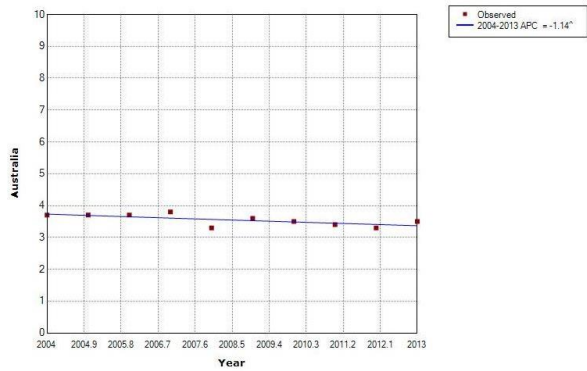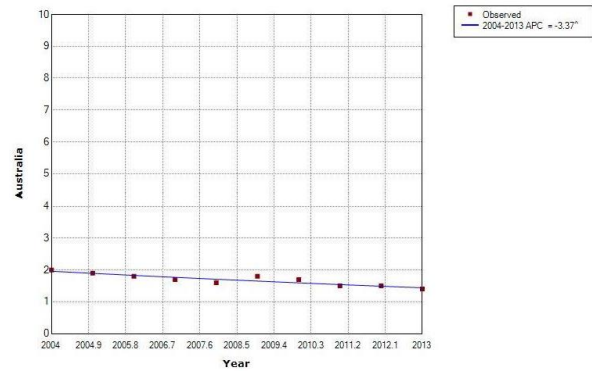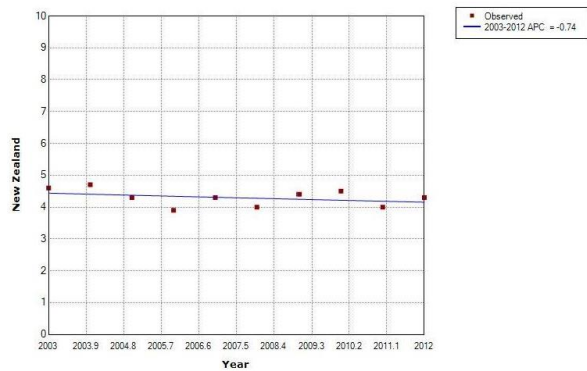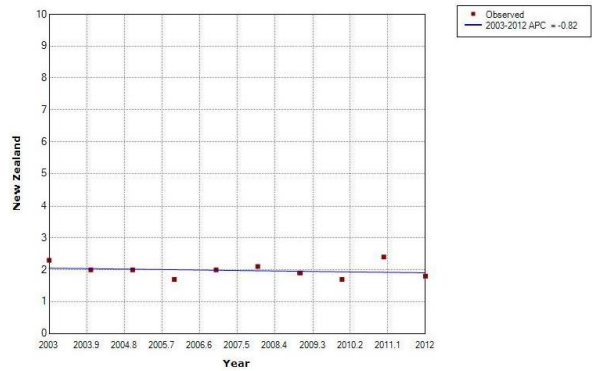

### 4) Northern Europe

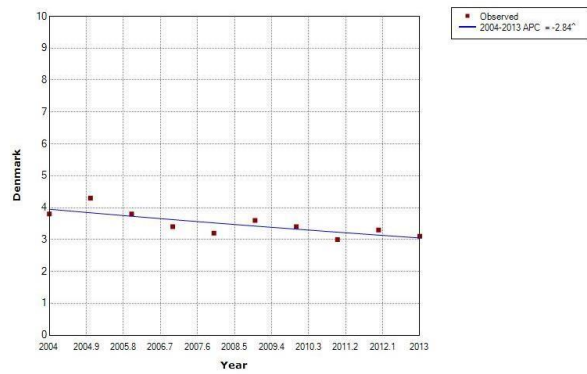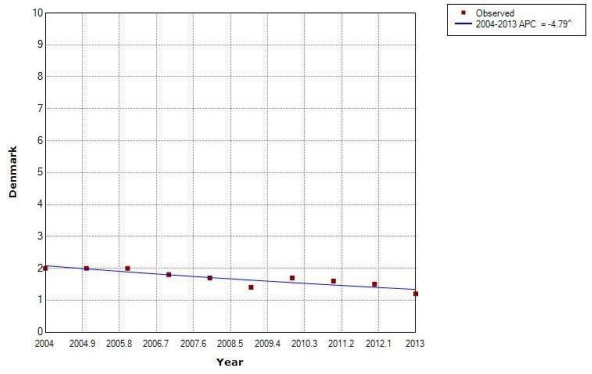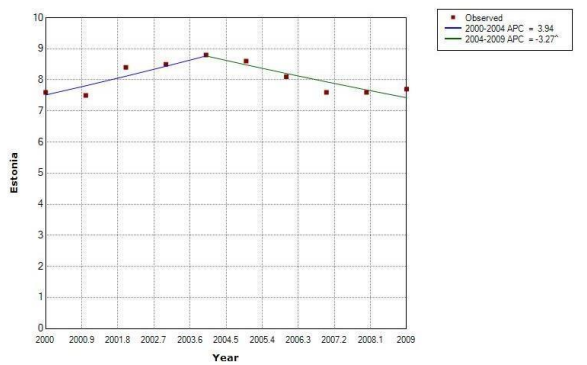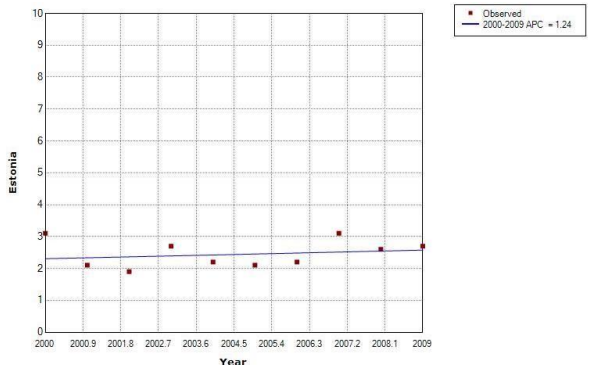

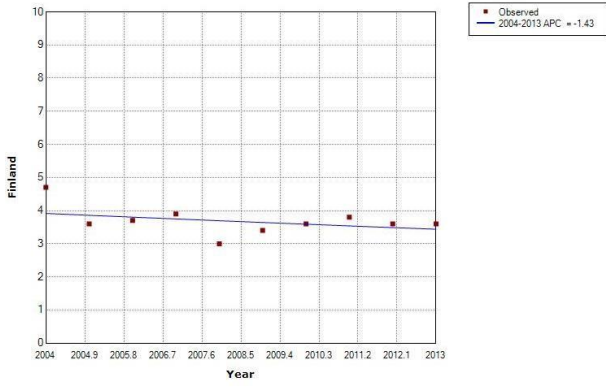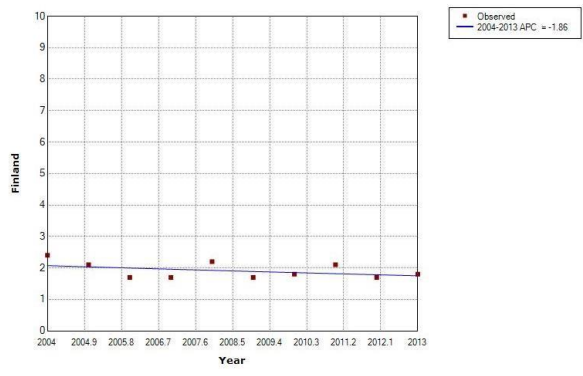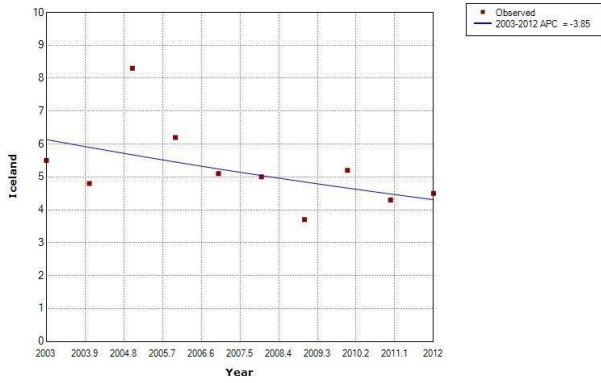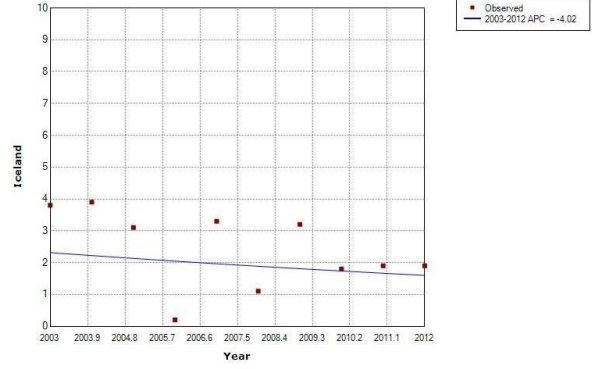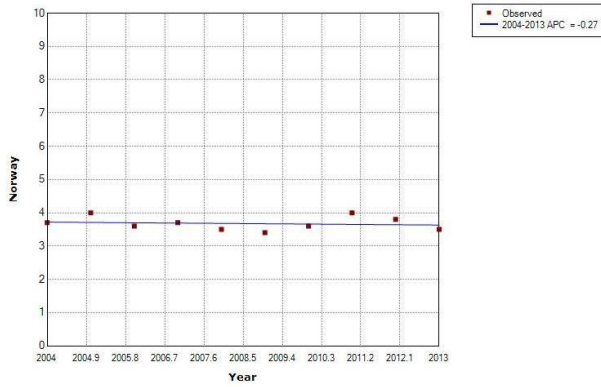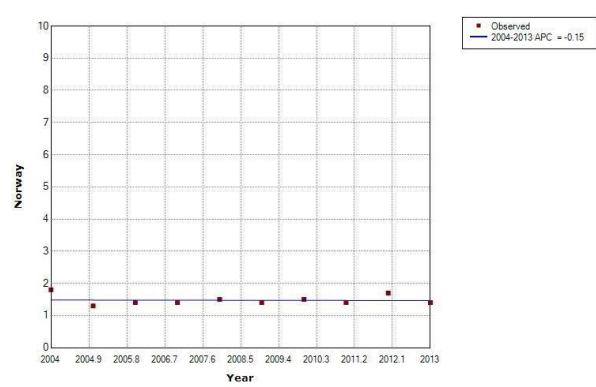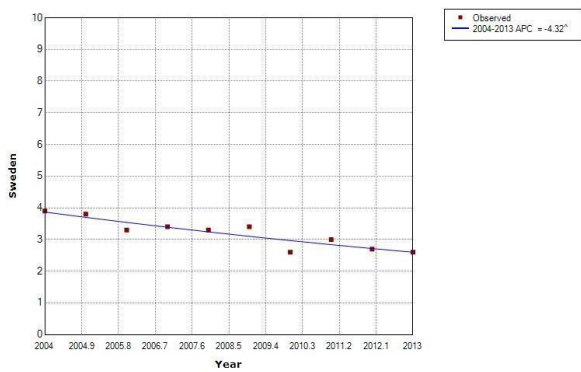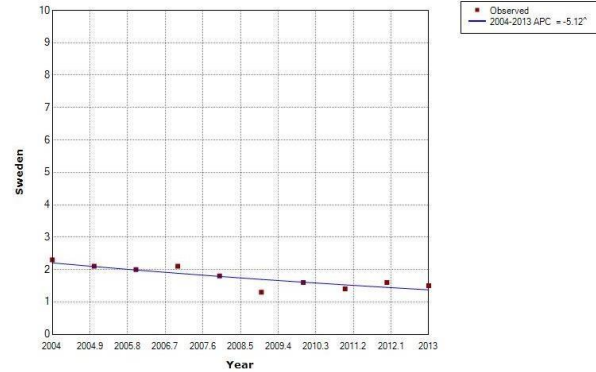



## 5) Western Europe

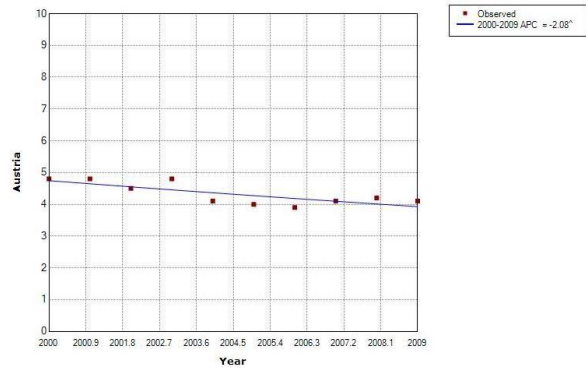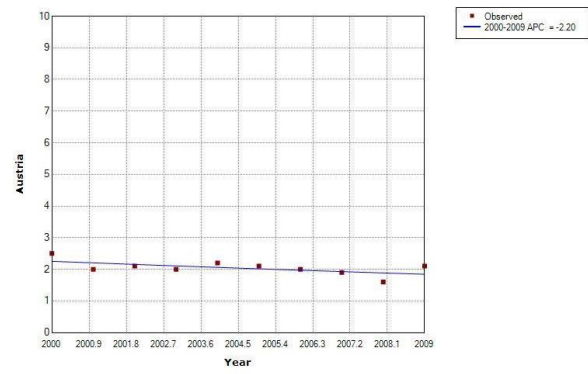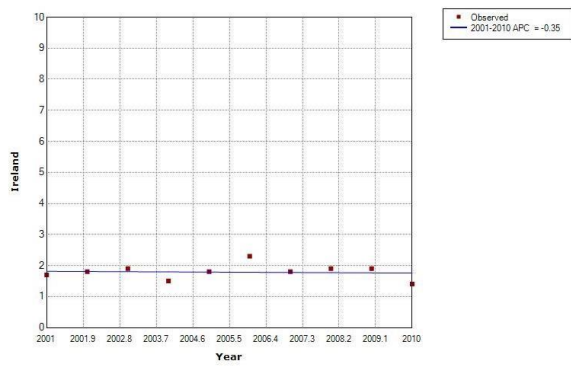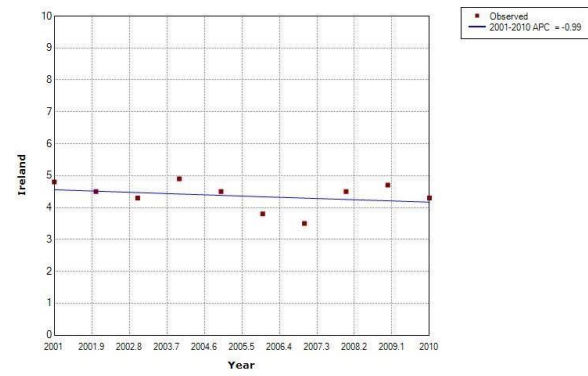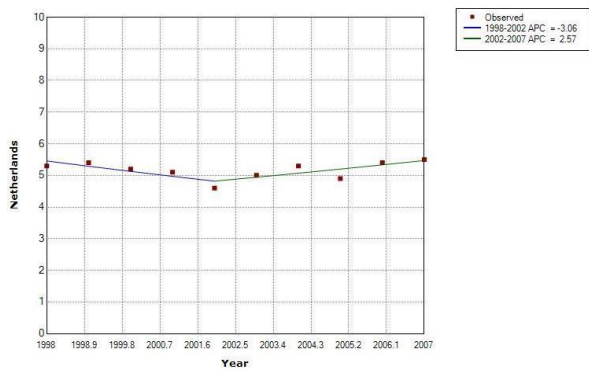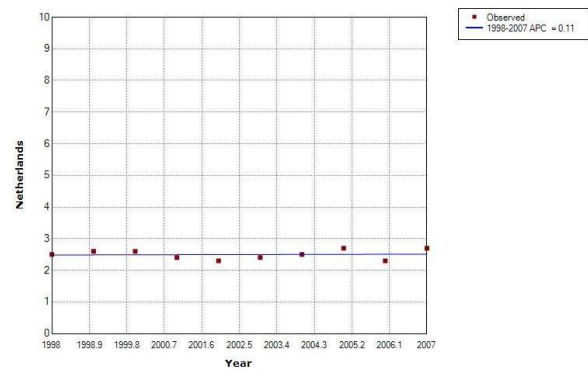

## 6) Southern Europe

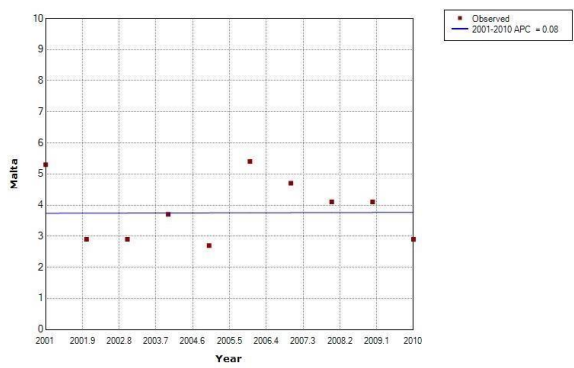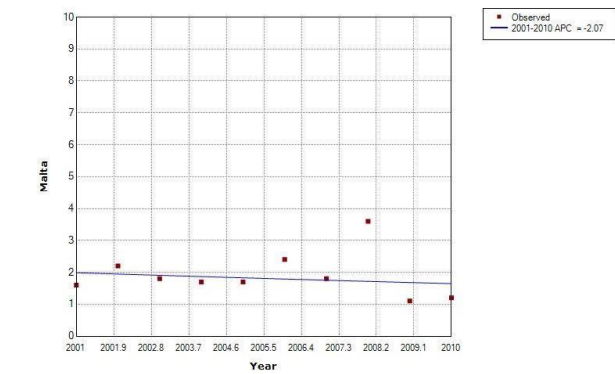

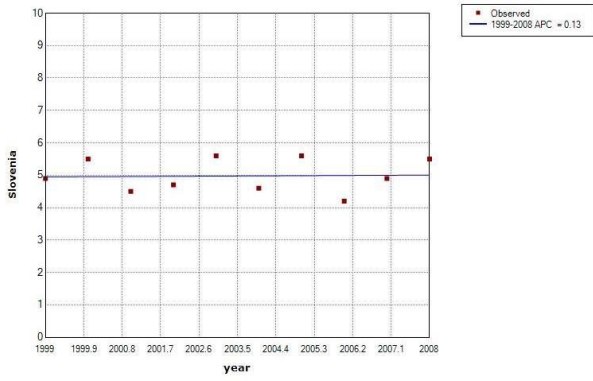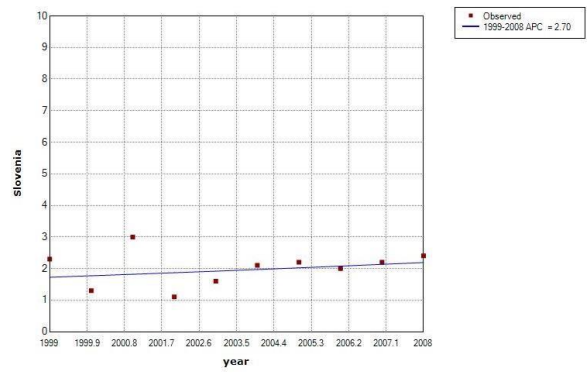

## 7) Eastern Europe

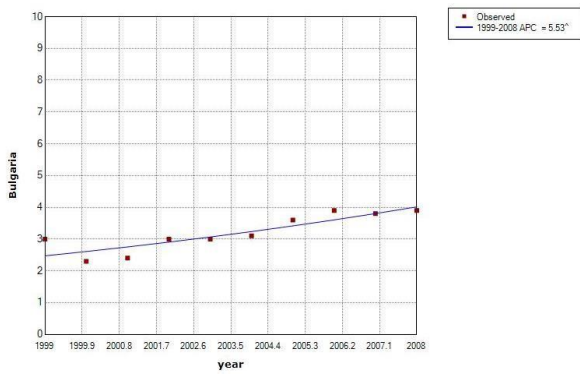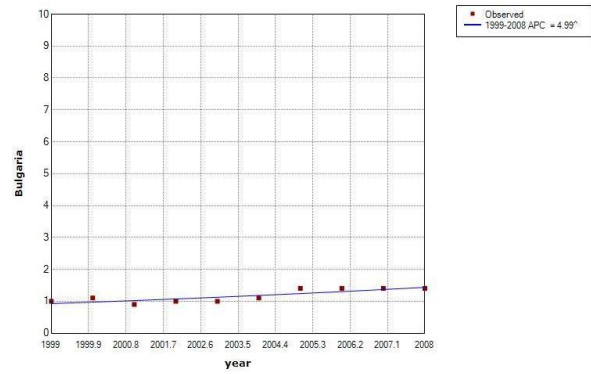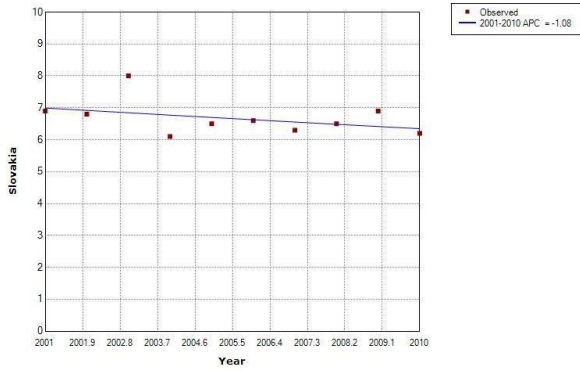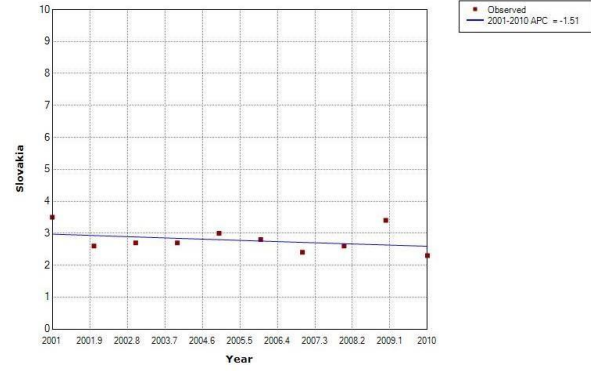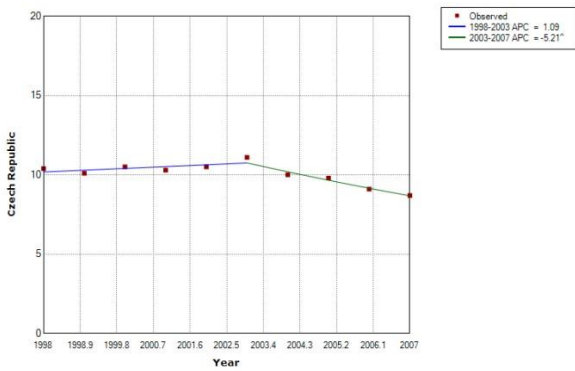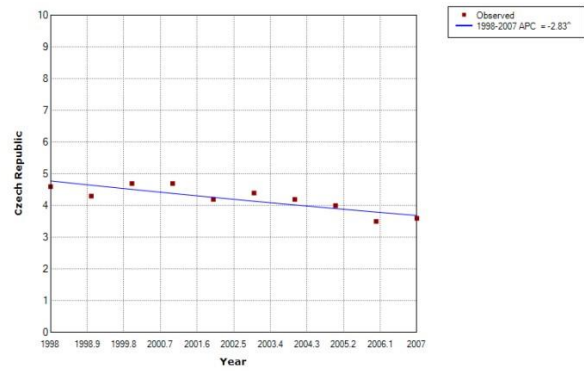

**Supplementary Figure 4 Annual Percent Change (APC)-based predicted incidence and mortality rates of kidney cancer compared with the latest available rates (left: men; right: women)**

**(A). Latin America, the Caribbean and Northern America**

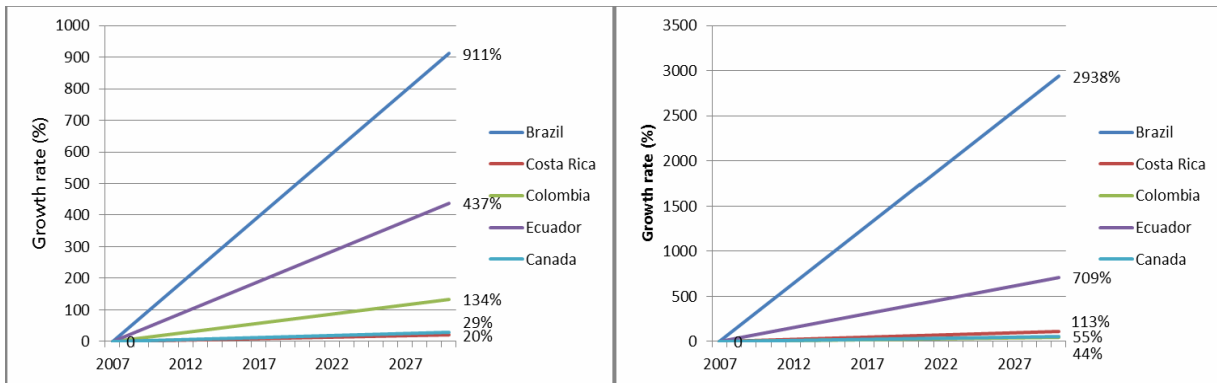

**(B). Asia**

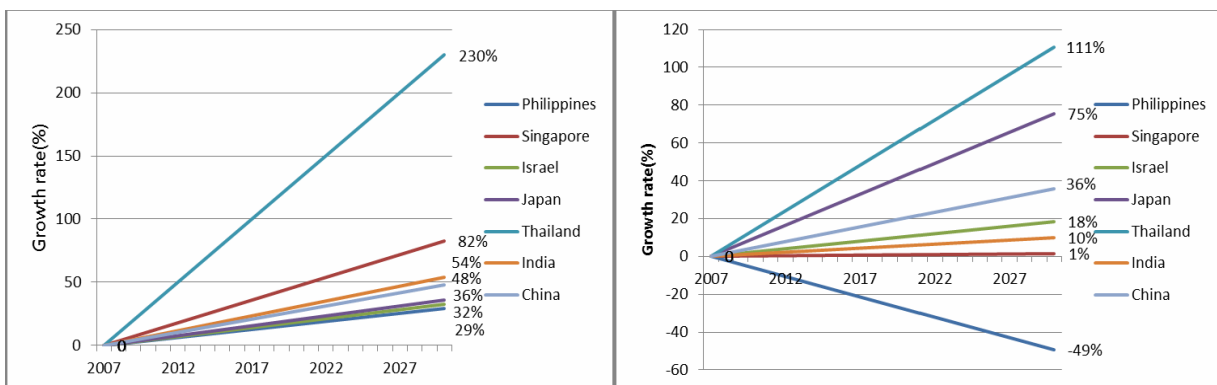

**(C). Oceania**

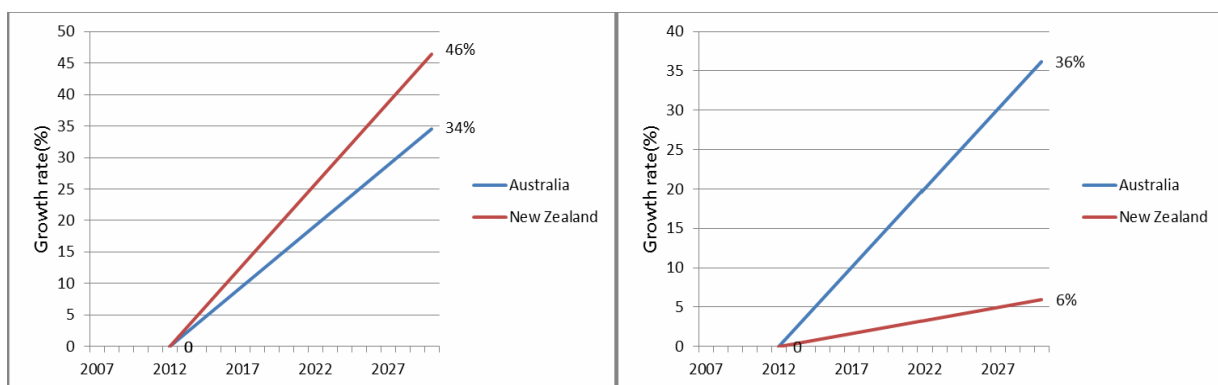



**(D). Northern Europe**

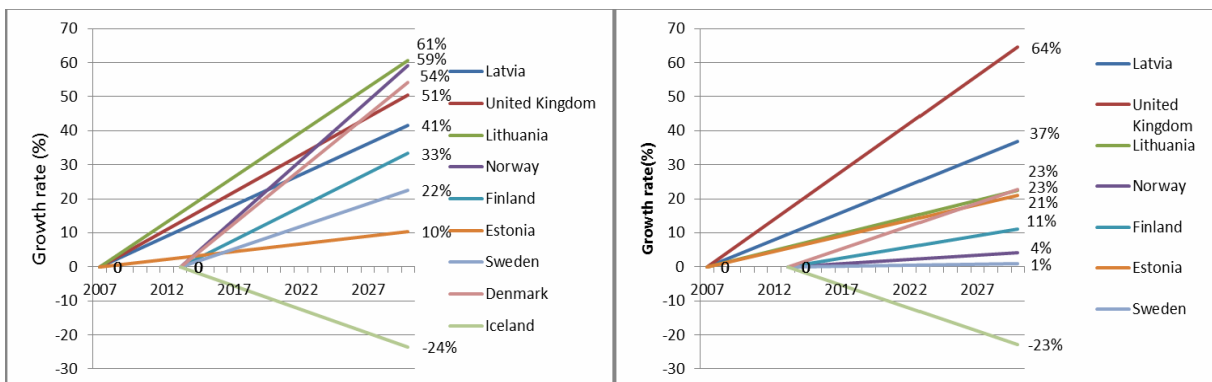

**(E). Western Europe**

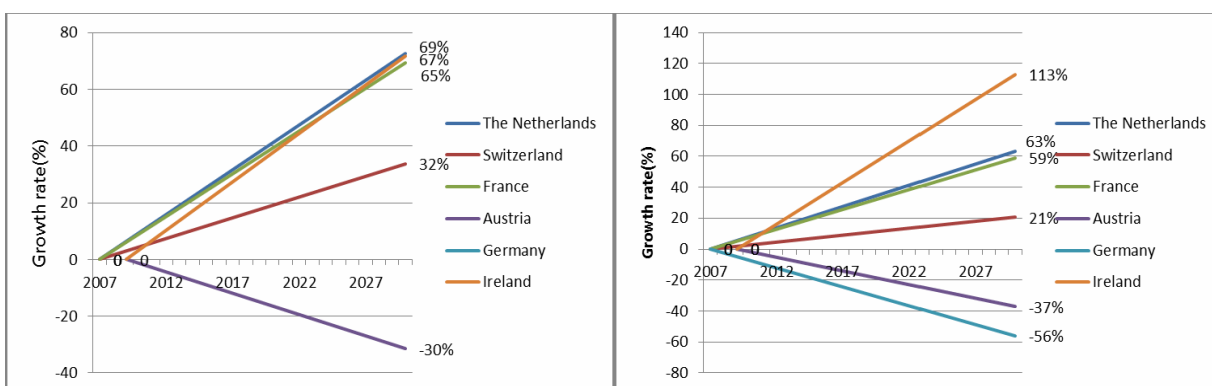

**(F). Southern Europe**

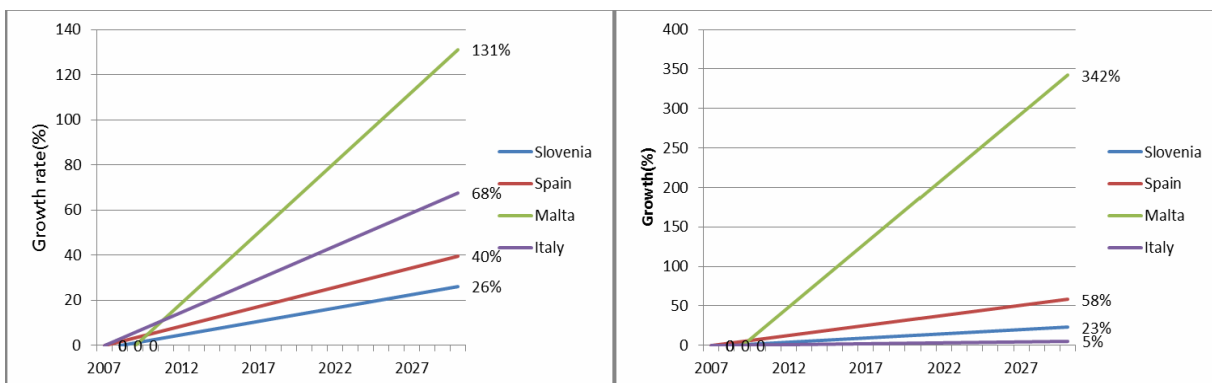

## (G). Eastern Europe

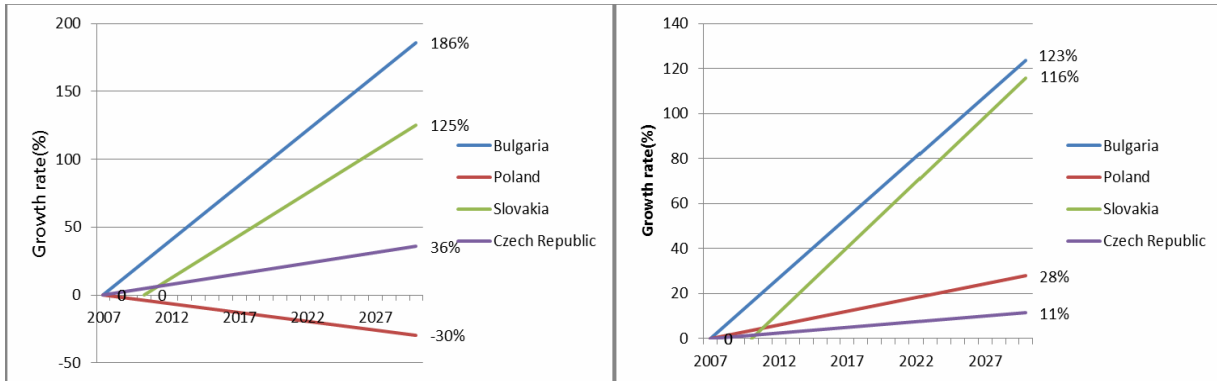

**Supplementary Figure 5 Annual Percent Change (APC)-based predicted mortality rates of kidney cancer compared with the latest available rates (left: men; right: women)**

**(A). Asia & Oceania**

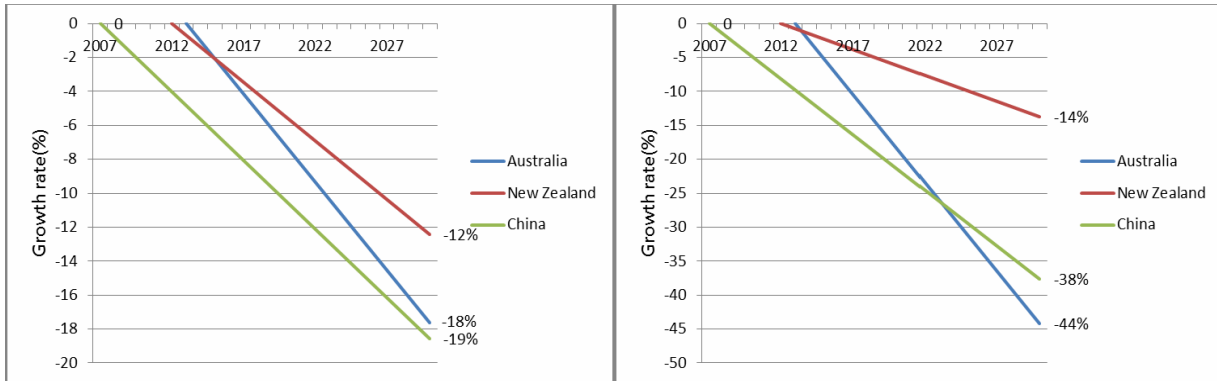

**(B). Northern Europe**

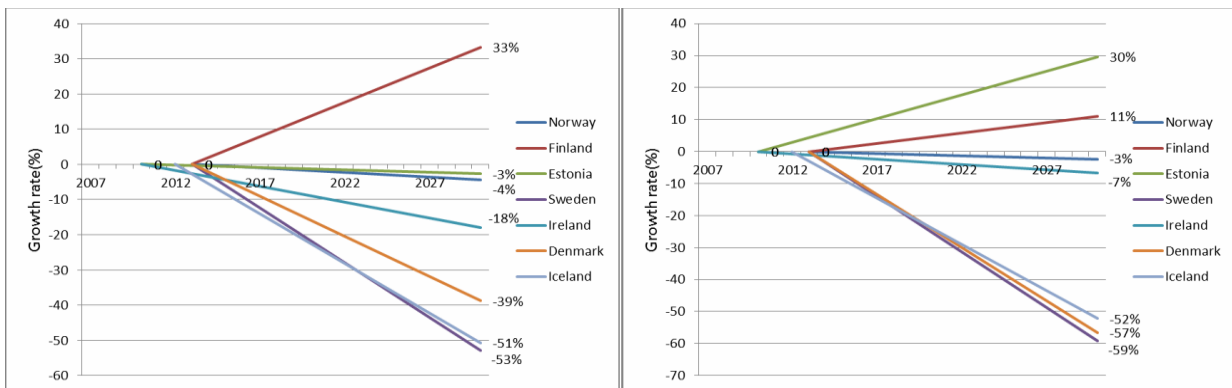

**(C).**

**Western Europe**

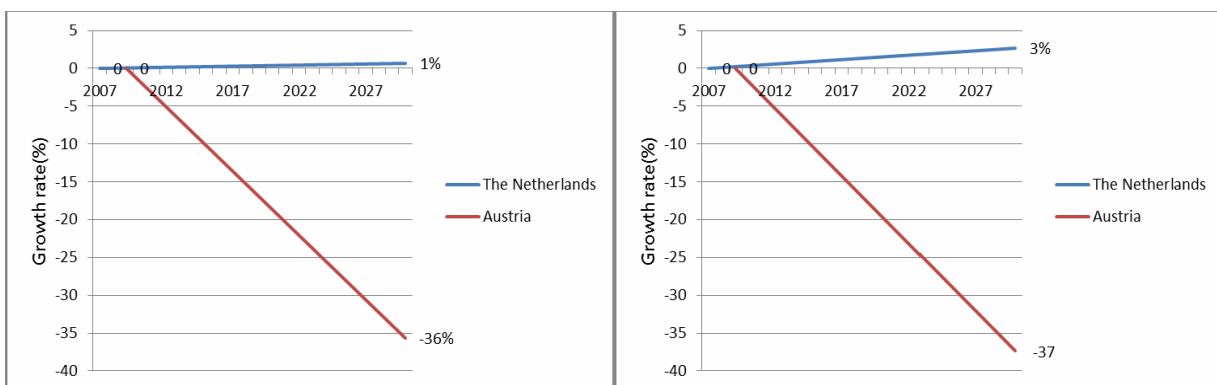

### (D). Southern Europe

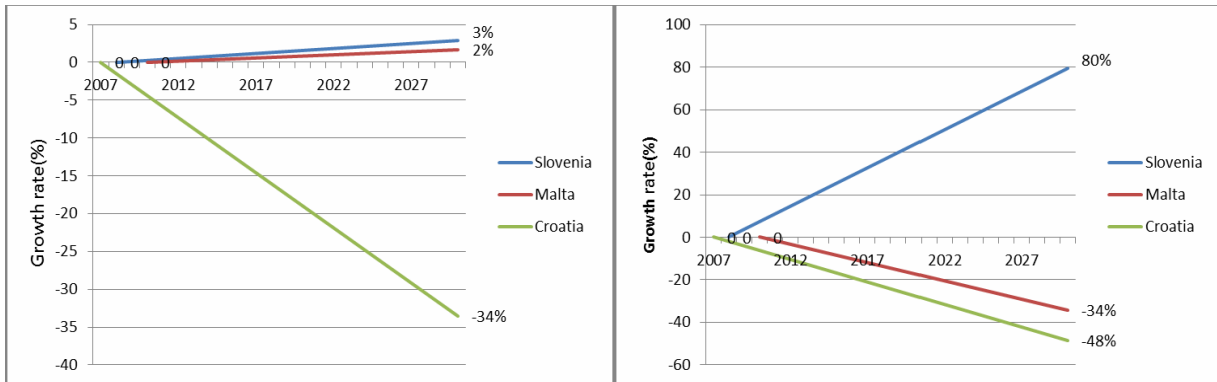

### (E). Eastern Europe

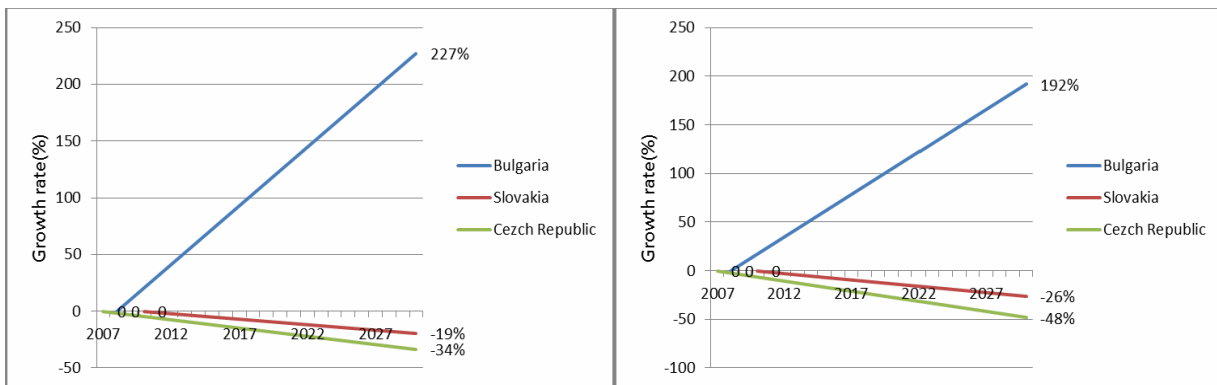

Supplement: 41598_2017_15922_MOESM1_ESM.pdf [file 41598_2017_15922_MOESM1_ESM.pdf]
